# Supplementary material for: Quantum tunnelling dominates chloride leaching from polyvinyl chloride
Source: Royal Society of Chemistry journal article supplement (doi:10.1039/d4cc03489a), 2024-01-01
Supplement: d4cc03489a1.pdf [file d4cc03489a1.pdf]

## SUPPORTING INFORMATION

### Quantum Tunnelling Dominates Chloride Leaching from Polyvinyl Chloride

Gbolagade Olajide and Tibor Szilvási\*

Department of Chemical and Biological Engineering, The University of Alabama, Tuscaloosa,  
AL, 35487

\*Corresponding author: [tibor.szilvasi@ua.edu](mailto:tibor.szilvasi@ua.edu)

#### Table of Contents

|                                                                                 |    |
|---------------------------------------------------------------------------------|----|
| <b>1. Computational Methods</b> .....                                           | 2  |
| <b>2. Semiclassical and QT-corrected Rates</b> .....                            | 7  |
| <b>3. Kinetic Isotope Effects (KIE) Analysis</b> .....                          | 12 |
| <b>4. Tunnelling Calculations with an Explicit Water Molecule Present</b> ..... | 13 |
| <b>5. Sample Polyrate Input and Output Files</b> .....                          | 14 |
| <b>A. Sample Polyrate Input Files</b> .....                                     | 14 |
| <b>B. Sample Polyrate Output Files</b> .....                                    | 21 |
| <b>6. Cartesian Coordinates of Stationary Points</b> .....                      | 22 |
| <b>A. Cartesian Coordinates of Stationary Points Used in Polyrate</b> .....     | 22 |
| <b>B. Cartesian Coordinates of All Structures</b> .....                         | 27 |
| <b>References</b> .....                                                         | 82 |

## 1. Computational Methods

In this section, we detail our methodology, including conformer search, basis set and functional benchmarking, computational model validation, and tunnelling calculations. We perform all density functional theory (DFT) calculations with Gaussian 16<sup>1</sup> and use ORCA 5.0.4<sup>2</sup> for domain-based local pair natural orbital coupled-cluster theory<sup>3</sup> (DLPNO-CCSD(T)) calculations. For the tunnelling calculations, we use Polyrate 17<sup>4</sup>, with Gaussrate 17<sup>5</sup> as an interface between Gaussian 16 and Polyrate 17.

### Conformer Search

We use the Conformer-Rotamer Ensemble Sampling Tool<sup>6</sup> (CREST) to determine the most stable conformer of all the reactants and products. We consider conformers within 6 kcal/mol of the lowest energy conformer at the GFN2-xTB<sup>7</sup> level of theory after metadynamics simulations with a 1.5 fs timestep.<sup>8</sup> We then optimize the generated conformers at the  $\omega$ B97X-D(SMD=Water)/6-31+G(d,p)<sup>9-14</sup> level of theory and retain the lowest-energy structure. We confirm all stationary points by a normal mode analysis.

### Benchmarking the Basis Set and Density Functional

We aim to accurately describe the potential energy surface of the studied reaction while maintaining reasonable computational cost. For this reason, we benchmark various DFT methods and basis sets on electronic energy barriers ( $\Delta E^\ddagger$ ) using DLPNO-CCSD(T)/aug-cc-pVTZ// $\omega$ B97X-D/def2-QZVPPD<sup>3, 13, 15, 16</sup> as our reference. We compare three methods: M06-2X,<sup>17</sup>  $\omega$ B97X-D,<sup>13</sup> and DLPNO-CCSD(T) with the “TightPNO” option.<sup>3</sup> M06-2X and  $\omega$ B97X-D are known to perform relatively well on barrier heights,<sup>18</sup> while DLPNO-CCSD(T) has been shown to be of comparable accuracy to CCSD(T), the gold standard in quantum chemistry.<sup>3, 19</sup> We also evaluate seven basis sets: 6-31+G(d,p),<sup>9, 12</sup> 6-31++G(d,p),<sup>10, 12, 14, 20</sup> 6-311+G(d,p),<sup>9, 20</sup> 6-311++G(d,p),<sup>9</sup> def2-TZVPPD,<sup>16, 21</sup> aug-cc-pVTZ,<sup>15, 22, 23</sup> and def2-QZVPPD.<sup>21, 24</sup> We include solvation effects using the SMD model.<sup>11</sup> Sample input files can be found in Section 3B of the Supporting Information (SI). Our results in Table S1 show that the studied composite methods, DLPNO-CCSD(T)/aug-cc-pVTZ// $\omega$ B97X-D/def2-QZVPPD, DLPNO-CCSD(T)(SMD=Water)/def2-TZVPPD// $\omega$ B97X-D(SMD=Water)/6-311+G(d,p), and DLPNO-CCSD(T)(SMD=Water)/def2-TZVPPD// $\omega$ B97X-D(SMD=Water)/6-31+G(d,p), provide very similar energy barriers ( $\Delta E^\ddagger = 19.8, 20.9,$  and  $20.9$  kcal/mol, respectively). We also find that the geometries calculated with the  $\omega$ B97X-D functional do not change significantly with the various basis sets. To demonstrate that we mention the critical O-H bond length in the transition state is 1.255, 1.267, 1.256, 1.279, 1.279, 1.274, and 1.275 Å with def2-QZVPPD, aug-cc-pVTZ, def2-TZVPPD, 6-311++G(d,p), 6-311+G(d,p), 6-31++G(d,p), and 6-31+G(d,p), respectively. Overall, we conclude that  $\omega$ B97X-D provides reasonable geometries for our system. Furthermore, we see that  $\omega$ B97X-D also provides reasonable energetics with small basis set size where the error relative to our reference method is only -0.9, -1.7, -1.0, -1.9, -1.9, -1.6, and -1.6 kcal/mol (Table S1) when used with def2-QZVPPD, aug-cc-pVTZ, def2-TZVPPD, 6-311++G(d,p), 6-311+G(d,p), 6-31++G(d,p), and 6-31+G(d,p), respectively. Conversely, M06-2X(SMD=Water)/6-31+G(d,p) and M06-2X(SMD=Water)/6-311+G(d,p) perform relatively poorly with a relative error of -3.8 and -3.9 kcal/mol, respectively. Hence, we select  $\omega$ B97X-D(SMD=Water)/6-311+G(d,p) for the tunnelling calculations. Finally, we note that  $\omega$ B97X-D(SMD=Water)/6-311+G(d,p) underestimates the thermal barrier slightly and thus the contribution of quantum tunnelling to the chloride leaching rate is expected to be higher than indicated by the chosen level of theory.<sup>25</sup>

**Table S1.** Electronic energy barriers ( $\Delta E^\ddagger$ ) for chloride leaching from the two monomer-unit model at different levels of theory.  $\Delta E_{rel}^\ddagger$  represents the difference in  $\Delta E^\ddagger$  given by each method and that given by DLPNO-CCSD(T)(SMD=Water)/aug-cc-pVTZ// $\omega$ B97X-D(SMD=Water)/def2-QZVPPD.

| Method                                                                         | $\Delta E^\ddagger$<br>(kcal/mol) | $\Delta E_{rel}^\ddagger$<br>(kcal/mol) |
|--------------------------------------------------------------------------------|-----------------------------------|-----------------------------------------|
| DLPNO-CCSD(T)(SMD=Water)/aug-cc-pVTZ// $\omega$ B97X-D(SMD=Water)/def2-QZVPPD  | 19.8                              | 0.0                                     |
| DLPNO-CCSD(T)(SMD=Water)/def2-TZVPPD// $\omega$ B97X-D(SMD=Water)/6-311+G(d,p) | 20.9                              | 0.9                                     |
| DLPNO-CCSD(T)(SMD=Water)/def2-TZVPPD// $\omega$ B97X-D(SMD=Water)/6-31+G(d,p)  | 20.9                              | 0.9                                     |
| $\omega$ B97X-D(SMD=Water)/def2-QZVPPD                                         | 18.9                              | -0.9                                    |
| $\omega$ B97X-D(SMD=Water)/def2-TZVPPD                                         | 18.8                              | -1.0                                    |
| $\omega$ B97X-D(SMD=Water)/6-311++G(d,p)                                       | 18.2                              | -1.6                                    |
| $\omega$ B97X-D(SMD=Water)/6-31+G(d,p)                                         | 18.2                              | -1.6                                    |
| $\omega$ B97X-D(SMD=Water)/aug-cc-pVTZ                                         | 18.1                              | -1.7                                    |
| $\omega$ B97X-D(SMD=Water)/6-311++G(d,p)                                       | 17.9                              | -1.9                                    |
| $\omega$ B97X-D(SMD=Water)/6-311+G(d,p)                                        | 17.9                              | -1.9                                    |
| M06-2X(SMD=Water)/6-31+G(d,p)                                                  | 16.0                              | -3.8                                    |
| M06-2X(SMD=Water)/6-311+G(d,p)                                                 | 15.9                              | -3.9                                    |

### Benchmarking the Computational Model

We also investigate the convergence of  $\Delta E^\ddagger$ , the reaction energy ( $\Delta E_R$ ), and the transition state imaginary frequency ( $\nu_i$ ) with respect to the number of monomer units used in the computational model. We select  $\Delta E^\ddagger$ ,  $\Delta E_R$ , and  $\nu_i$  as they are strongly related to quantum tunnelling due to the dependence of tunnelling probabilities on barrier height and width.<sup>26, 27</sup> We calculate the chosen parameters for models containing 2, 3, 4, and 5 monomer units. Sample input files can be found in Section 3B of this document. We present our results in Table S2. We observe minimal variation in  $\Delta E^\ddagger$ ,  $\Delta E_R$ , and  $\nu_i$  as function of model size at  $\omega$ B97X-D(SMD=Water)/def2-TZVPPD level of theory.  $\nu_i$  is 1501, 1520, 1490, and 1531  $\text{cm}^{-1}$  for the 2, 3, 4, and 5 monomer-unit models, respectively.  $\Delta E^\ddagger$  is also relatively consistent with values of 18.8, 19.2, 18.5, and 19.1 kcal/mol for the 2, 3, 4, and 5 monomer-unit models, respectively. The same consistency is observed in  $\Delta E_R$  (Table S2). Using  $\omega$ B97X-D(SMD=Water)/6-311+G(d,p), we also observe minimal variation in  $\Delta E^\ddagger$ ,  $\Delta E_R$ , and  $\nu_i$  and what is more important, results are in agreement with the  $\omega$ B97X-D(SMD=Water)/def2-TZVPPD results (Table S2).  $\nu_i$  changes non-monotonically between 1491 and 1524  $\text{cm}^{-1}$  for the 2 and 5 monomer-unit models, respectively.  $\Delta E^\ddagger$  is also consistent with values of 17.9, 17.6, 17.2, and 17.8 kcal/mol for the 2, 3, 4, and 5 monomer-unit models, respectively.  $\Delta E_R$  changes marginally, at 20.6, 19.5, 19.2, and 19.7 kcal/mol for the 2, 3, 4, and 5 monomer-unit models, respectively. Finally, we also see a similar trend with  $\omega$ B97X-D(SMD=Water)/6-31+G(d,p) (Table S2). Given the negligible variations in  $\Delta E^\ddagger$ ,  $\Delta E_R$ , and  $\nu_i$  on all three levels of theory used, we infer that tunnelling probabilities are likely to be similar across the different models. Consequently, we select the 2 monomer-unit model for subsequent tunnelling calculations due to computational cost reasons.

**Table S2.** Computed reaction energy ( $\Delta E_R$ ), electronic energy barrier ( $\Delta E^\ddagger$ ), enthalpy barrier ( $\Delta H^\ddagger$ ), and free energy barrier ( $\Delta G^\ddagger$ ) in kcal/mol, as well as the transition state imaginary frequency ( $\nu_i$ ) in  $\text{cm}^{-1}$  for chloride leaching from the 2, 3, 4, and 5 monomer-unit models.

|   | $\omega B97X-D(SMD=Water)/6-31+G(d,p)$ |                     |                     |                     |         | $\omega B97X-D(SMD=Water)/def2-TZVPPD$ |                     |                     |                     |         | $\omega B97X-D(SMD=Water)/6-311+G(d,p)$ |                     |                     |                     |         |
|---|----------------------------------------|---------------------|---------------------|---------------------|---------|----------------------------------------|---------------------|---------------------|---------------------|---------|-----------------------------------------|---------------------|---------------------|---------------------|---------|
|   | $\Delta E_R$                           | $\Delta E^\ddagger$ | $\Delta H^\ddagger$ | $\Delta G^\ddagger$ | $\nu_i$ | $\Delta E_R$                           | $\Delta E^\ddagger$ | $\Delta H^\ddagger$ | $\Delta G^\ddagger$ | $\nu_i$ | $\Delta E_R$                            | $\Delta E^\ddagger$ | $\Delta H^\ddagger$ | $\Delta G^\ddagger$ | $\nu_i$ |
| 2 | -19.5                                  | 18.2                | 15.6                | 23.5                | 1475    | -19.7                                  | 18.8                | 15.7                | 23.9                | 1501    | -20.6                                   | 17.9                | 14.8                | 23.0                | 1491    |
| 3 | -19.3                                  | 18.3                | 15.3                | 23.7                | 1486    | -19.0                                  | 19.2                | 16.1                | 24.6                | 1520    | -19.5                                   | 17.6                | 14.5                | 22.8                | 1480    |
| 4 | -18.4                                  | 17.5                | 14.4                | 22.4                | 1461    | -18.6                                  | 18.5                | 15.5                | 23.6                | 1490    | -19.2                                   | 17.2                | 14.2                | 22.6                | 1480    |
| 5 | -19.1                                  | 18.0                | 15.1                | 25.2                | 1504    | -19.3                                  | 19.1                | 16.2                | 27.4                | 1531    | -19.7                                   | 17.8                | 14.9                | 25.1                | 1524    |

### Tunnelling calculations

We then carry out canonical variational theory<sup>28-30</sup> (CVT) calculations to determine the tunnelling contribution to the total reaction rate. The Page-McIver algorithm<sup>31</sup> (*rpm pagem*) is used to calculate the minimum energy path (MEP) from the saddle point towards the reactants and products. The first step is taken by following the direction defined by the normal mode of the imaginary frequency at the saddle point (firststep *nmode*). Energies and gradients are computed at every point along the MEP, and the Hessian is calculated every 9<sup>th</sup> step (inh 9). We select a gradient step size of 0.002 bohr.amu<sup>1/2</sup> (sstep 0.002), consistent with values used in recent literature.<sup>28, 32-35</sup> The method of central differences is used to compute the curvature along the MEP (curv *dgrad*). Generalized normal mode analyses performed at each Hessian grid point are carried out in redundant internal coordinates<sup>28</sup> (coord *curv3*). After the calculation of the MEP, the variational transition state is located as the point of maximum vibrationally-adiabatic energy<sup>29</sup> ( $Va^G$ ). The effective reduced mass ( $\mu_{\text{eff}}$ ) is computed by spline interpolation<sup>30</sup> (scopt *spline*). Finally, using the small curvature tunnelling<sup>29, 36</sup> (SCT) approximation, the transmission coefficient and tunnelling probabilities are computed. We select the widely used CVT/SCT method as it is relatively accurate while being computationally efficient.<sup>28, 29</sup>

The transmission coefficient,  $\kappa$ , which is the ratio of the total rate to the semiclassical rate ( $k_{\text{SCT}} / k_{\text{CVT}}$ ), corrects for the effects of nonclassical reflection and tunnelling on the semiclassical rate. Since tunnelling takes place at lower energies than nonclassical reflection, the former is generally the dominant correction to the semiclassical rate. Thus,  $k_{\text{SCT}}$ , which corrects for both tunnelling and reflection, can be said to effectively correct for the former *alone*; and  $\kappa = 1$  indicates no tunnelling, while  $\kappa > 1$  indicates tunnelling. We calculate the percentage of the total rate due to tunnelling (%Tun) thus:

$$\%Tun = \frac{k_{\text{SCT}} - k_{\text{CVT}}}{k_{\text{SCT}}} = \frac{\kappa - 1}{\kappa} \quad (1)$$

Calculating the entire MEP as required for CVT from *ab initio* electronic structure theory can be computationally demanding, potentially requiring several thousands of single-points, gradients, and Hessian calculations.<sup>4, 30</sup> Hence, we calculate the MEP to different extents (*s*) with and without extrapolation. Extrapolation is calculated using the Mapped Interpolation (MI) algorithm<sup>37</sup> with an extrapolation step size of 0.05 bohr.amu<sup>1/2</sup> (exstep 0.05). Results in Table S3 below indicate that  $\kappa$  converges to about 13.9 when  $s = -1.5$  to  $+1.5$  bohr.amu<sup>1/2</sup> (slp 1.5 and slm -1.5) with and without extrapolation, indicating that tunnelling probabilities are already converged. Therefore, we report all results using  $s = -1.5$  to  $+1.5$  bohr.amu<sup>1/2</sup> in this work. The sample input files can be found in Section 3A of this document.

**Table S3.** Convergence of the SCT transmission coefficient ( $\kappa$ ) with computed MEP extent ( $s$ ) for chloride leaching from the two monomer-unit model at  $\omega$ B97X-D(SMD=Water)/6-311+G(d,p) level of theory at 298 K. For each run, the MEP was computed from - $s$  to + $s$  (i.e.  $slm=-s$  and  $slp=s$ ). Constant Polyrate 17 settings used were: `coord=curv3`, `curv=dgrad`, `inh=9`, `norods`, `sstep=0.001 bohr`, `firststep=nmode`, `scopt=spline`, `intmu=3`, and `rpm=pagem`. For extrapolated MEPs, additional settings used were: `exnstep=50` and `exstep=0.05 bohr` for both `exfirst` and `exsecond`.

| $s$ (bohr. amu <sup>1/2</sup> ) | Extrapolation | $\kappa$ |
|---------------------------------|---------------|----------|
| 1.0                             | No            | 100.51   |
| 1.0                             | Yes           | 12.64    |
| 1.5                             | No            | 13.92    |
| 1.5                             | Yes           | 13.91    |
| 2.0                             | No            | 13.91    |
| 2.0                             | Yes           | 13.91    |
| 3.0                             | No            | 13.91    |
| 4.0                             | No            | 13.91    |
| 7.0                             | No            | 13.91    |

We also vary the above-mentioned parameters (`sstep`, `rpm`, `scopt`, `firststep`, `inh`, `curv`, and `coord`) to observe the variation of  $\kappa$  to test the reliability of our settings. We present our results in Table S4 below. We observe a slight change in  $\kappa$  (from 13.91 to 13.69) when  $\mu_{\text{eff}}$  is computed via Lagrangian interpolation (`scopt lagrange`) rather than spline fitting. Furthermore,  $\kappa$  remains practically unchanged (13.91 vs. 13.92) when the starting algorithm is changed from a quadratic to a cubic one (`firststep cubic`).  $\kappa$  increases to 14.23 when the curvature along the MEP is computed using the Hessian, gradient, and normal-mode eigenvectors (`curv dhess`) rather than central differences. We observe a slight decrease in  $\kappa$  when the gradient step size is increased ( $\kappa = 13.91$  and  $9.56$  for `sstep = 0.002` and  $0.004$  respectively). This underestimation of  $\kappa$  by larger gradient step sizes has previously been noted by other researchers.<sup>34</sup> We also note a modest decrease (from 13.91 to 11.43) in  $\kappa$  when the method for following the MEP is changed from the Page-McIver integrator to Euler-steepest descents (`rpm esd`). Furthermore,  $\kappa$  barely changes to 12.86 when the Hessian is computed every 6<sup>th</sup> (rather than 9<sup>th</sup>) step along the MEP (`inh 6`). The above discussion demonstrates that the tunnelling calculations for chloride leaching are very insensitive to the chosen parameters, as the tunnelling contribution (%Tun) only varies by 3% between 90% and 93% (Table S4). We conclude that our settings provide a reliable estimate on the tunnelling contribution to chloride leaching in PVC.

**Table S4.** Variation of the SCT transmission coefficient ( $\kappa$ ), QT-corrected rate constant ( $k_{SCT}$ ) in  $s^{-1}$ , and tunnelling contribution (%Tun) with respect to important settings in Polyrate 17 for chloride leaching from the two monomer-unit model at  $\omega$ B97X-D(SMD=Water)/6-311+G(d,p) level at 298 K. Constant Polyrate-17 settings used: slp=1.5, slm=-1.5 (both in bohr.amu<sup>1/2</sup>) – at these values,  $\kappa$  and  $k_{SCT}$  are already quite converged with respect to  $s$  – and extrapolation of the MEP (exnstep=50 and exstep=0.05 bohr.amu<sup>1/2</sup> for both exfirst and exsecond).

| coord | curv  | inh | rods   | sstep | firststep | Scopt    | rpm   | Results  |           |      |
|-------|-------|-----|--------|-------|-----------|----------|-------|----------|-----------|------|
|       |       |     |        |       |           |          |       | $\kappa$ | $k_{SCT}$ | %Tun |
| curv3 | dgrad | 9   | rods   | 0.002 | nmode     | Spline   | pagem | 14.85    | 1.4       | 93   |
| curv3 | dhess | 9   | norods | 0.002 | nmode     | Spline   | pagem | 14.23    | 40.1      | 93   |
| curv3 | dgrad | 9   | norods | 0.002 | cubic     | Spline   | pagem | 13.92    | 39.2      | 93   |
| curv3 | dgrad | 9   | norods | 0.002 | nmode     | Spline   | pagem | 13.91    | 39.2      | 93   |
| curv3 | dgrad | 9   | norods | 0.002 | nmode     | Spline   | pagem | 13.90    | 39.2      | 93   |
| curv3 | dgrad | 9   | norods | 0.002 | nmode     | lagrange | pagem | 13.69    | 38.5      | 93   |
| cart  | dgrad | 9   | norods | 0.002 | nmode     | Spline   | pagem | 13.46    | 36.7      | 93   |
| curv3 | dgrad | 6   | norods | 0.002 | nmode     | Spline   | pagem | 12.86    | 35.3      | 92   |
| curv3 | dgrad | 9   | norods | 0.002 | nmode     | Spline   | esd   | 11.43    | 32.2      | 91   |
| curv3 | dgrad | 9   | norods | 0.004 | nmode     | Spline   | pagem | 9.56     | 26.9      | 90   |

## 2. Semiclassical and QT-corrected Rates

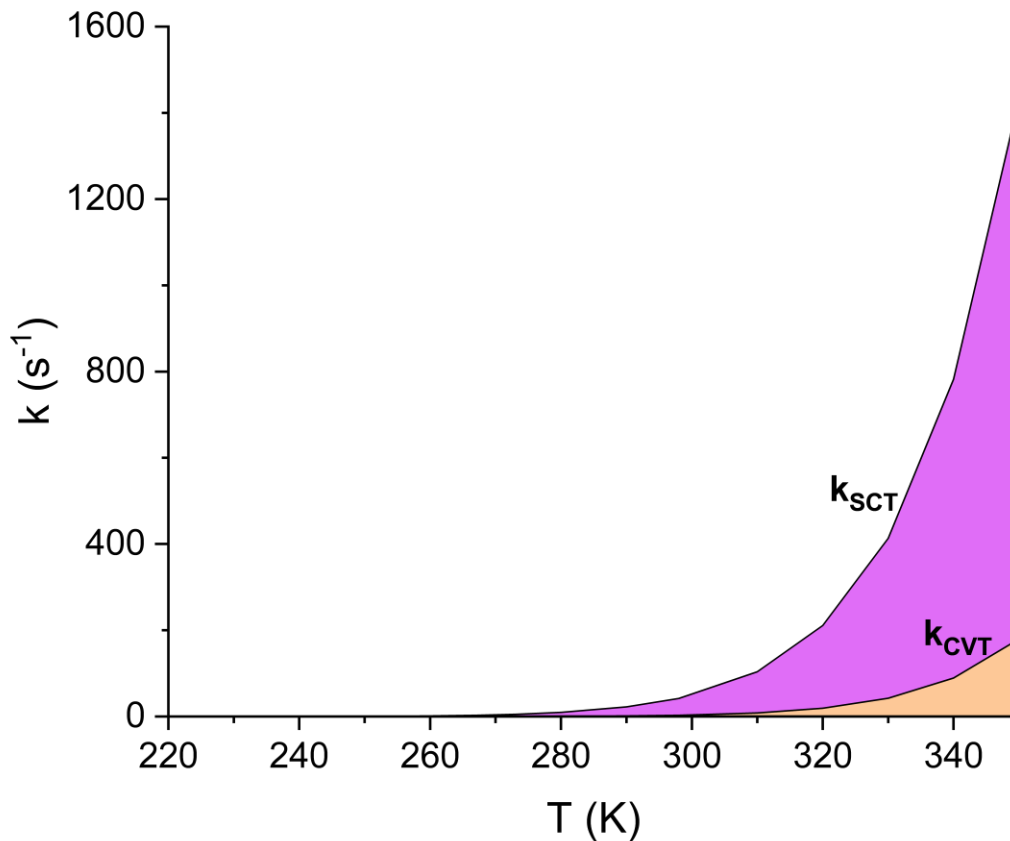

**Figure S1.** Plot of the QT-corrected rate constant ( $k_{\text{SCT}}$ ) and semiclassical rate constant ( $k_{\text{CVT}}$ ) versus temperature (in K) for chloride leaching from the two monomer-unit model at  $\omega\text{B97X-D(SMD=Water)/6-311+G(d,p)}$  level of theory.

**Table S5.** Variation of the semiclassical rate constant ( $k_{CVT}$ ) and QT-corrected rate constant ( $k_{SCT}$ ) in  $s^{-1}$ , transmission coefficient ( $\kappa$ ), and tunnelling contribution (%Tun) with respect to temperature (in K) for chloride leaching in the two monomer-unit model at  $\omega$ B97X-D(SMD=Water)/6-311+G(d,p) level of theory. Low temperature results are only shown for the completeness of the calculated results; does not hold practical relevance.

| T (K) | $k_{CVT}$              | $k_{SCT}$              | $\kappa$              | %Tun |
|-------|------------------------|------------------------|-----------------------|------|
| 70    | $4.21 \times 10^{-39}$ | $1.89 \times 10^{-16}$ | $44.9 \times 10^{21}$ | 100  |
| 90    | $6.94 \times 10^{-28}$ | $9.29 \times 10^{-15}$ | $13.4 \times 10^{12}$ | 100  |
| 110   | $9.87 \times 10^{-21}$ | $2.71 \times 10^{-12}$ | $27.4 \times 10^7$    | 100  |
| 130   | $9.05 \times 10^{-16}$ | $6.77 \times 10^{-10}$ | $74.8 \times 10^4$    | 100  |
| 150   | $4.01 \times 10^{-12}$ | $8.45 \times 10^{-8}$  | $21.1 \times 10^3$    | 100  |
| 170   | $2.49 \times 10^{-9}$  | $5.46 \times 10^{-6}$  | $21.9 \times 10^2$    | 100  |
| 190   | $4.04 \times 10^{-7}$  | $1.93 \times 10^{-4}$  | $47.9 \times 10^1$    | 100  |
| 205   | $9.61 \times 10^{-6}$  | $1.98 \times 10^{-3}$  | $20.6 \times 10^1$    | 100  |
| 220   | $1.49 \times 10^{-4}$  | $1.57 \times 10^{-2}$  | $10.5 \times 10^1$    | 99   |
| 230   | $7.61 \times 10^{-4}$  | $5.51 \times 10^{-2}$  | 72.43                 | 99   |
| 240   | $3.40 \times 10^{-3}$  | $1.77 \times 10^{-1}$  | 52.08                 | 98   |
| 250   | $1.35 \times 10^{-2}$  | $5.24 \times 10^{-1}$  | 38.90                 | 97   |
| 260   | $4.82 \times 10^{-2}$  | 1.45                   | 30.00                 | 97   |
| 267   | $1.11 \times 10^{-1}$  | 2.82                   | 25.43                 | 96   |
| 273   | $2.20 \times 10^{-1}$  | 4.89                   | 22.28                 | 96   |
| 280   | $4.70 \times 10^{-1}$  | 9.06                   | 19.29                 | 95   |
| 290   | 1.31                   | $2.08 \times 10^1$     | 15.98                 | 94   |
| 298   | 2.82                   | $3.92 \times 10^1$     | 13.91                 | 93   |
| 310   | 8.29                   | $9.56 \times 10^1$     | 11.52                 | 91   |
| 320   | $1.92 \times 10^1$     | $1.92 \times 10^2$     | 10.00                 | 90   |
| 330   | $4.23 \times 10^1$     | $3.71 \times 10^2$     | 8.78                  | 89   |
| 340   | $8.89 \times 10^1$     | $6.93 \times 10^2$     | 7.79                  | 87   |
| 350   | $1.79 \times 10^2$     | $1.25 \times 10^3$     | 6.98                  | 86   |



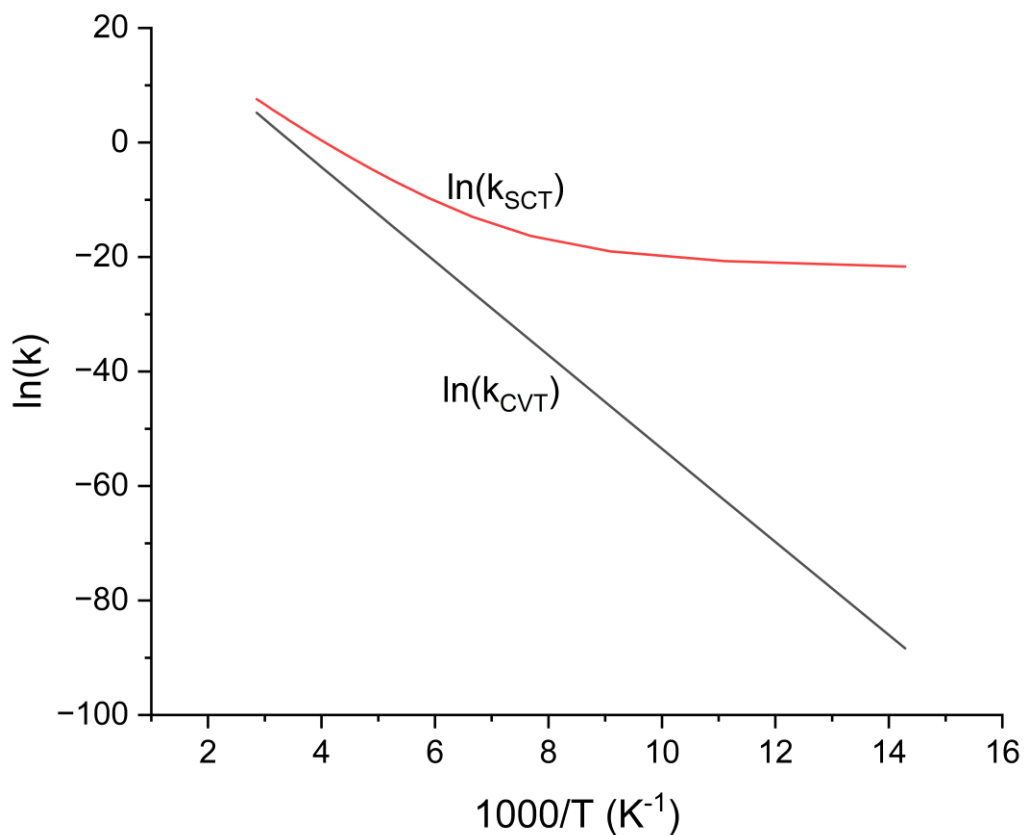

**Figure S2.** Arrhenius plot illustrating the shallow and deep tunnelling regimes for chloride leaching from the two monomer-unit model at  $\omega$ B97X-D(SMD=Water)/6-311+G(d,p) level of theory. The temperature ranges from 70 – 350 K. Low temperature results are only shown for the completeness of the calculated results; does not hold practical relevance.

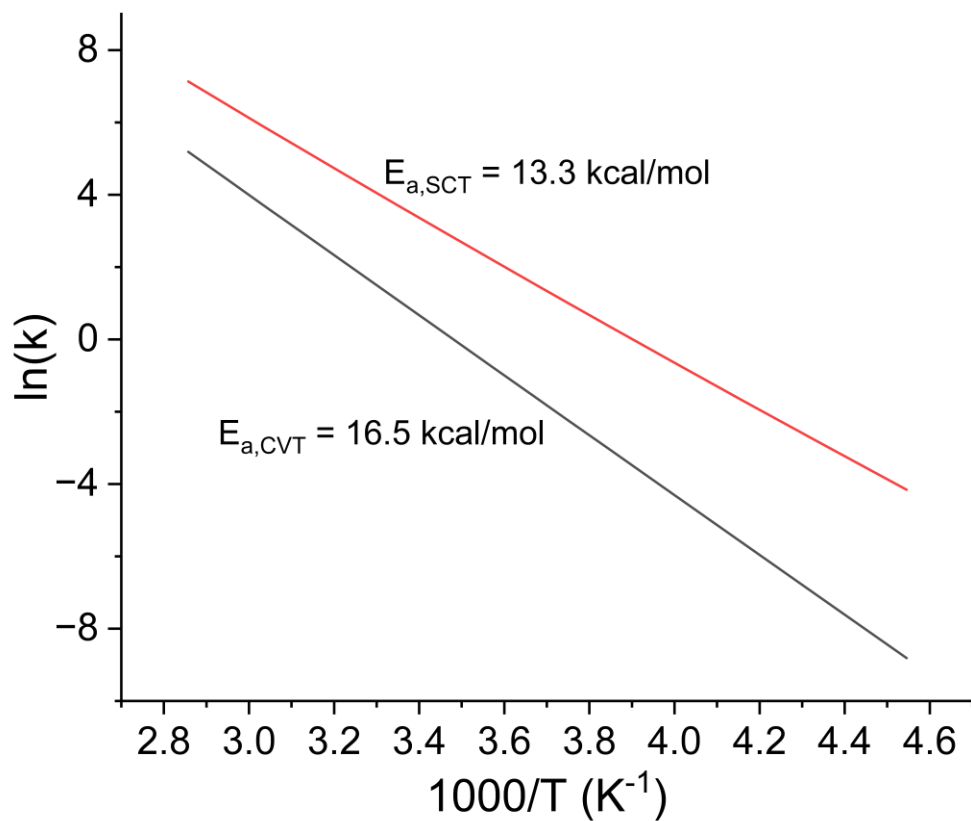

**Figure S3.** Arrhenius plots to get the semiclassical and tunnelling-corrected activation energies for chloride leaching from the two monomer-unit model for the temperature range of 220 – 350 K at  $\omega$ B97X-D(SMD=Water)/6-311+G(d,p) level of theory.

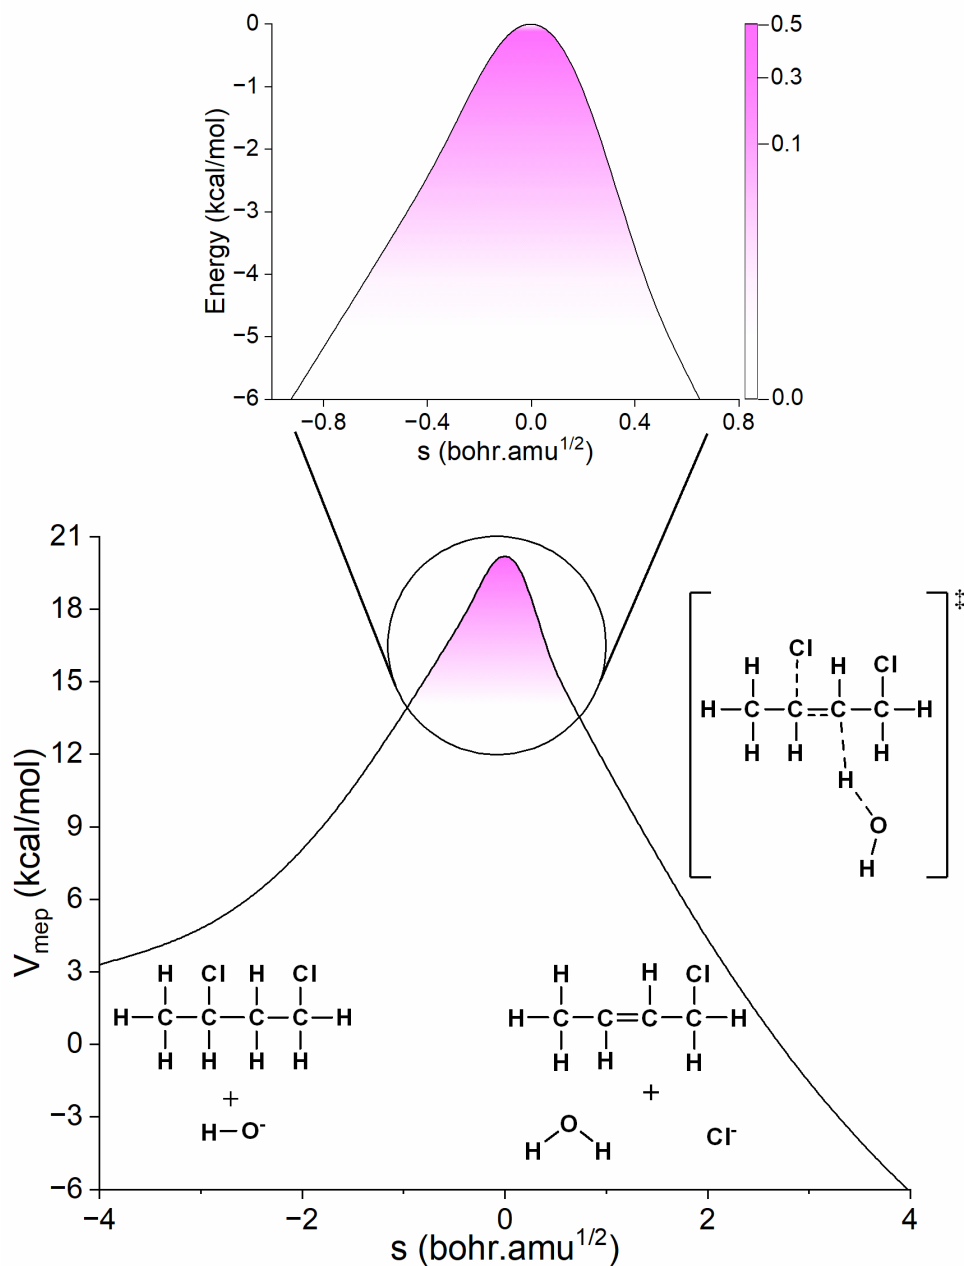

**Figure S4.** Potential energy curve of the minimum energy path ( $V_{\text{mep}}$ ) as a function of the calculated mass-scaled reaction coordinate ( $s$ ) at  $\omega\text{B97X-D(SMD=Water)/6-311+G(d,p)}$  level of theory for the two monomer-unit model. The vertical axis of the inset is the potential energy relative to the transition state, and the vertical axis of the figure is the potential energy relative to the reactants. The shaded region is derived by plotting the tunnelling probabilities against  $s$  as derived from the Polyrate fu6 output file. 96 % of the tunnelling occurs within the shaded region. The values on the colour scale are the tunnelling probabilities.

### 3. Kinetic Isotope Effects (KIE) Analysis

We perform KIE analysis to discern the contribution of different atoms to the tunnelling phenomenon. We study the KIE in the leaving H, the C bonded to the leaving H, and the leaving Cl. In Table S6, we present our results between 70 and 350 K. The H/D KIE is 23.18 at 298 K, and ranges from 56.08 at 70 K to 16.44 at 350 K. Generally, a H/D KIE  $> 6 - 7$  at room temperature indicates H-tunnelling,<sup>27</sup> hence the calculated H/D KIEs suggest that H-tunnelling is important in this reaction across the entire calculated temperature range (70 – 350 K). The C-12/C-14 KIE is 2.60 at 298 K and ranges from 5.73 to 2.46 at 70 K and 350 K respectively. The Cl-35/Cl-37 KIE is 2.51 at 298 K and ranges from 8.33 to 2.38 at 70 K and 350 K respectively. Though we note that a direct comparison of H/D KIEs with KIEs of other different elements is complicated by the difference in their masses, our results demonstrate that H-tunnelling is plays an important role in the overall QT.

**Table S6.** Calculated H/D, C-12/C-14, and Cl-35/Cl-37 KIEs between 70 K and 350 K for chloride leaching in the two monomer-unit model at the  $\omega$ B97X-D(SMD=Water)/6-311+G(d,p) level of theory. Low temperature results are only shown for the completeness of the calculated results.

| T(K) | KIE   |           |             |
|------|-------|-----------|-------------|
|      | H/D   | C-12/C-14 | Cl-35/Cl-37 |
| 70   | 56.08 | 5.73      | 8.33        |
| 90   | 54.35 | 3.29      | 3.99        |
| 110  | 75.99 | 3.70      | 3.79        |
| 130  | 88.09 | 4.12      | 3.93        |
| 150  | 76.85 | 3.98      | 3.72        |
| 170  | 63.67 | 3.66      | 3.44        |
| 190  | 53.70 | 3.37      | 3.18        |
| 205  | 47.63 | 3.18      | 3.02        |
| 220  | 42.35 | 3.03      | 2.89        |
| 230  | 39.10 | 2.95      | 2.83        |
| 240  | 36.20 | 2.88      | 2.76        |
| 250  | 33.41 | 2.82      | 2.70        |
| 260  | 30.94 | 2.76      | 2.65        |
| 267  | 29.32 | 2.73      | 2.61        |
| 273  | 27.97 | 2.70      | 2.59        |
| 280  | 26.56 | 2.67      | 2.57        |
| 290  | 24.64 | 2.63      | 2.53        |
| 298  | 23.18 | 2.60      | 2.51        |
| 310  | 21.33 | 2.56      | 2.48        |
| 320  | 19.93 | 2.53      | 2.45        |
| 330  | 18.65 | 2.51      | 2.43        |
| 340  | 17.50 | 2.48      | 2.41        |
| 350  | 16.44 | 2.46      | 2.38        |

#### 4. Tunnelling Calculations with an Explicit Water Molecule Present

Implicit solvation models can be a source of error for reactive species such as OH<sup>-</sup>. To test the validity of the implicit solvent model, we carry out electronic structure calculations and tunnelling calculations at the  $\omega$ B97X-D(SMD=Water)/6-311+G(d,p) level of theory on a two monomer-unit model with an explicit water molecule present. On including the explicit water molecule into the calculations, we still assume that all reactants are infinitely separated from each other, and the water has a concentration of 55.56 mol/l corresponding to the concentration of liquid water. With such reference state,  $\Delta G_R$  increases by 5.2 kcal/mol to -25.7 kcal/mol, while  $\Delta E_R$  decreases by 3.3 kcal/mol to -23.9 kcal/mol. On the other hand,  $\Delta G^\ddagger$  decreases by 11 kcal/mol to 22.2 kcal/mol, and  $\Delta E^\ddagger$  decreases by 7 kcal/mol to 10.9 kcal/mol.

**Table S7.** Variation of the semiclassical rate constant ( $k_{CVT}$ ) and QT-corrected rate constant ( $k_{SCT}$ ) in  $s^{-1}$ , transmission coefficient ( $\kappa$ ), and tunnelling contribution (%Tun) with respect to temperature (in K) for chloride leaching in the two monomer-unit model at  $\omega$ B97X-D(SMD=Water)/6-311+G(d,p) level of theory, with an explicit water molecule present.

| T (K) | $k_{CVT}$              | $k_{SCT}$              | $\kappa$              | %Tun |
|-------|------------------------|------------------------|-----------------------|------|
| 70    | $5.93 \times 10^{-44}$ | $1.81 \times 10^{-19}$ | $3.06 \times 10^{24}$ | 100  |
| 90    | $1.20 \times 10^{-31}$ | $6.91 \times 10^{-18}$ | $5.75 \times 10^{13}$ | 100  |
| 110   | $8.34 \times 10^{-24}$ | $2.15 \times 10^{-15}$ | $2.58 \times 10^8$    | 100  |
| 130   | $2.28 \times 10^{-18}$ | $8.59 \times 10^{-13}$ | $3.78 \times 10^5$    | 100  |
| 150   | $2.24 \times 10^{-14}$ | $1.76 \times 10^{-10}$ | $7.89 \times 10^3$    | 100  |
| 170   | $2.56 \times 10^{-11}$ | $1.91 \times 10^{-8}$  | $7.46 \times 10^2$    | 100  |
| 190   | $6.70 \times 10^{-9}$  | $1.10 \times 10^{-6}$  | $1.64 \times 10^2$    | 99   |
| 205   | $2.15 \times 10^{-7}$  | $1.58 \times 10^{-5}$  | 73.28                 | 99   |
| 220   | $4.33 \times 10^{-6}$  | $1.71 \times 10^{-4}$  | 39.41                 | 97   |
| 230   | $2.58 \times 10^{-5}$  | $7.26 \times 10^{-4}$  | 28.11                 | 96   |
| 240   | $1.33 \times 10^{-4}$  | $2.79 \times 10^{-3}$  | 21.01                 | 95   |
| 250   | $6.01 \times 10^{-4}$  | $9.81 \times 10^{-3}$  | 16.32                 | 94   |
| 260   | $2.42 \times 10^{-3}$  | $3.17 \times 10^{-2}$  | 13.08                 | 92   |
| 267   | $6.05 \times 10^{-3}$  | $6.89 \times 10^{-2}$  | 11.39                 | 91   |
| 273   | $1.28 \times 10^{-2}$  | $1.30 \times 10^{-1}$  | 10.21                 | 90   |
| 280   | $2.94 \times 10^{-2}$  | $2.66 \times 10^{-1}$  | 9.07                  | 89   |
| 290   | $9.00 \times 10^{-2}$  | $7.00 \times 10^{-1}$  | 7.78                  | 87   |
| 298   | $2.09 \times 10^{-1}$  | 1.45                   | 6.96                  | 86   |

|     |                       |       |      |    |
|-----|-----------------------|-------|------|----|
| 310 | $6.83 \times 10^{-1}$ | 4.09  | 5.99 | 83 |
| 320 | 1.71                  | 9.19  | 5.36 | 81 |
| 330 | 4.07                  | 19.72 | 4.84 | 79 |
| 340 | 9.21                  | 40.66 | 4.42 | 77 |
| 350 | 19.9                  | 80.71 | 4.06 | 75 |

## 5. Sample Polyrate Input and Output Files

### A. Sample Polyrate Input Files

We list Polyrate and Gaussrate input files for the tunnelling calculations on the two monomer-unit model at the  $\omega$ B97X-D(SMD=Water)/6-311+G(d,p) level of theory. Gaussrate was used for interfacing Polyrate to Gaussian for electronic structure calculations.

#### tunnel.dat

```

*General                      9 H
TITLE                          10 H
C4H8Cl2 + OH- ---> C4H7Cl + Cl- + H2O 11 H
CVT/SCT calculations          12 H
END                             13 H
                                14 H
ATOMS                          15 H
1 C                            16 H
2 C                            END
3 C
4 C                            NOSUPERMOL
5 CL                           INPUNIT au
6 CL
7 O                            *OPTIMIZATION
8 H                            OPTMIN  ohook

```

|                  |                                         |
|------------------|-----------------------------------------|
| OPTTS ohook      | *PROD1                                  |
|                  | # STATUS 2                              |
| *SECOND          | INITGEO HOOKS                           |
| HESSCAL hhook    | GEOM                                    |
|                  | 1                                       |
| *REACT1          | 2                                       |
| # STATUS 2       | 3                                       |
| INITGEO HOOKS    | 4                                       |
| GEOM             | 5                                       |
| 1                | 6                                       |
| 2                | 7                                       |
| 3                | 8                                       |
| 4                | 9                                       |
| 5                | 10                                      |
| 6                | 11                                      |
| 7                | 12                                      |
| 8                | 13                                      |
| 9                | 14                                      |
| 10               | 15                                      |
| 11               | 16                                      |
| 12               | END                                     |
| 13               | SPECIES NONLINRP                        |
| 14               |                                         |
| 15               | *START                                  |
| 16               | STATUS 2                                |
| END              | GEOM                                    |
| SPECIES NONLINRP | 1 0.048046306 -0.677249767 -2.175529171 |
|                  | 2 -0.005637055 -0.729323081 0.658898629 |

|                                          |             |
|------------------------------------------|-------------|
| 3 2.430562931 -0.69888336 1.836134224    | 300         |
| 4 2.533965006 -0.879280468 4.665546689   | 320         |
| 5 -3.028245748 0.189399766 -3.51159253   | 350         |
| 6 4.640607963 -3.926442381 0.686834462   | END         |
| 7 -1.881842937 3.606044858 2.247438948   | EACT        |
| 8 3.760766246 0.647091616 1.035022308    | 273 298     |
| 9 -1.261938822 -2.188005148 1.411601411  | END         |
| 10 1.413997585 -2.468329122 5.35771018   | ANALYSIS    |
| 11 4.465980192 -1.050516179 5.357143262  | 273 298     |
| 12 1.72663211 0.864797601 5.43824656     | END         |
| 13 1.37438513 0.725840314 -2.893810578   |             |
| 14 0.465866808 -2.506227595 -3.027797882 | *TUNNEL     |
| 15 -0.932302424 1.509408005 1.509383439  | ZCT         |
| 16 -1.190155657 3.82148695 3.91289304    | SCT         |
| END                                      | WIGNER      |
| SPECIES NONLINTS                         | SCTOPT      |
| PROJECT                                  | SPLINE      |
|                                          | END         |
| *RATE                                    |             |
| FORWARDK                                 | *PATH       |
| SIGMAF 1                                 | INTMU 3     |
| CVT                                      | INH 9       |
| TST                                      | SSTEP 0.002 |
| TEMP                                     | SRANGE      |
| 220                                      | SLP 7       |
| 250                                      | SLM -7      |
| 273                                      | END         |
| 298                                      | RPM pagem   |



|                   |                      |
|-------------------|----------------------|
| COORD curv3       | 2-9 1-2-9 5-1-2-9    |
| CURV dgrad        | 4-10 3-4-10 2-3-4-10 |
| SIGN product      | 4-11 3-4-11 2-3-4-11 |
| SADDLE            | 4-12 3-4-12 2-3-4-12 |
| INTDEF            | 1-13 2-1-13 3-2-1-13 |
| 1-5 1-2 5-1-2     | 1-14 2-1-14 3-2-1-14 |
| 2-3 1-2-3 5-1-2-3 | 7-15 2-7-15 1-2-7-15 |
| 3-4 2-3-4 1-2-3-4 | 7-16 2-7-16 1-2-7-16 |
| 3-6 2-3-6 1-2-3-6 | END                  |
| 2-7 1-2-7 5-1-2-7 |                      |
| 3-8 2-3-8 1-2-3-8 | #end of file         |

**tunnel.70**

\*GRGENERAL

GRRESTART

\*GRREACT1

charge -1

multiplicity 1

\*GRPROD1

charge -1

multiplicity 1

\*GRSTART

charge -1

multiplicity 1

\*GRCOMMON

GRENER

%mem=85gb

%nprocshared=28

#wB97XD/6-311+G(d,p) UNITS=AU FCHK NOSYMM SCRF = (SMD) int=UltraFine

END

GRFIRST

%mem=85gb

%nprocshared=28

#wB97XD/6-311+G(d,p) FORCE UNITS=AU FCHK NOSYMM SCRF = (SMD) int=UltraFine

END

GRSEC

%mem=85gb

%nprocshared=28

#wB97XD/6-311+G(d,p) FREQ=NORAMAN UNITS=AU FCHK NOSYMM SCRF = (SMD) int=UltraFine

END

\*GRPATH

GRENER

%chk = guess.chk

%mem=85gb

%nprocshared=28

#wB97XD/6-311+G(d,p) UNITS=AU FCHK NOSYMM SCRF = (SMD) int=UltraFine

END

GRFIRST

%chk = guess.chk

%mem=85gb

%nprocshared=28

#wB97XD/6-311+G(d,p) FORCE UNITS=AU FCHK NOSYMM SCRF = (SMD) int=UltraFine

END

GRSEC

%chk = guess.chk

%mem=85gb

%nprocshared=28

#wB97XD/6-311+G(d,p) FREQ=NORAMAN UNITS=AU FCHK NOSYMM SCRF = (SMD) int=UltraFine

END

#end of keywords

### tunnel.71

#wB97XD 6-311+G(d,p) opt=calcfc int(ultrafine) nosymm fchk SCRF=(SMD, SOLVENT=Water)

react1

-1 1

|    |           |           |           |
|----|-----------|-----------|-----------|
| C  | -0.075992 | -0.281413 | -1.012614 |
| C  | -0.039549 | -0.732601 | 0.433383  |
| C  | 1.324820  | -0.542506 | 1.077101  |
| C  | 1.317763  | -0.847064 | 2.559212  |
| Cl | -1.767347 | -0.355359 | -1.663959 |
| Cl | 2.564110  | -1.623016 | 0.249846  |
| O  | -0.492427 | 2.967583  | 0.725991  |
| H  | 1.697191  | 0.465324  | 0.891162  |
| H  | -0.351194 | -1.777194 | 0.522558  |
| H  | 0.974826  | -1.867419 | 2.748265  |
| H  | 2.309759  | -0.717451 | 2.994820  |
| H  | 0.631604  | -0.153349 | 3.053577  |
| H  | 0.240687  | 0.755459  | -1.116758 |
| H  | 0.519956  | -0.916704 | -1.663987 |
| H  | -0.739621 | -0.124870 | 1.016213  |

H 0.012771 2.159184 0.836868

### tunnel.73

#wB97XD 6-311+G(d,p) opt=calcfc int(ultrafine) nosymm fchk SCRF=(SMD, SOLVENT=Water)

prod1

-1 1

C -0.102025 -0.094621 -0.012024

C -0.051015 -0.036763 1.471353

C 1.092575 0.043875 2.151441

C 1.203583 0.067726 3.640231

Cl -0.907845 1.402665 -0.702126

Cl 3.211214 3.511935 3.242478

O 0.154136 3.268638 2.600066

H 2.027085 0.096437 1.593647

H -1.001995 -0.087473 1.998359

H 0.222245 0.037426 4.119157

H 1.792748 -0.784781 3.993542

H 1.728768 0.972933 3.963099

H 0.889094 -0.130529 -0.459191

H -0.708021 -0.922500 -0.375054

H 0.033465 2.377174 2.255454

H 1.109780 3.316346 2.804812

## B. Sample Polyrates Output Files

### tunnel.fu15

Summary of forward rate constants in  $s^{-1}$

| T(K)   | TST      | CVT      | CVT/ZCT  | CVT/SCT  |
|--------|----------|----------|----------|----------|
| 220.00 | 1.49E-04 | 1.49E-04 | 2.66E-03 | 1.57E-02 |
| 250.00 | 1.35E-02 | 1.35E-02 | 1.29E-01 | 5.24E-01 |
| 273.00 | 2.20E-01 | 2.20E-01 | 1.48E+00 | 4.89E+00 |
| 298.00 | 2.82E+00 | 2.82E+00 | 1.41E+01 | 3.92E+01 |
| 300.00 | 3.39E+00 | 3.39E+00 | 1.67E+01 | 4.57E+01 |
| 320.00 | 1.92E+01 | 1.92E+01 | 7.83E+01 | 1.92E+02 |
| 350.00 | 1.79E+02 | 1.79E+02 | 5.84E+02 | 1.25E+03 |

### Parts of tunnel.fu6

Vibrationally adiabatic ground-state transmission coefficients

$\kappa^{+/CAG}$  - the classical transmission coefficient for correcting the classical threshold of conventional TST

$\kappa^{ZCT}$  - semiclassical transmission coefficient for tunnelling along MEP with zero curvature

$\kappa^{SCT}$  - semiclassical transmission coefficient for tunnelling along MCP, in small curvature limit.

Kappa factors

-----

| <b>T(K)</b> | <b>TST/W</b> | <b>TST/CAG</b> | <b>CVT/CAG</b> |
|-------------|--------------|----------------|----------------|
| 220         | 4.93E+00     | 9.99E-01       | 9.99E-01       |
| 250         | 4.05E+00     | 9.99E-01       | 9.99E-01       |
| 273         | 3.56E+00     | 9.99E-01       | 9.99E-01       |
| 298         | 3.14E+00     | 9.99E-01       | 9.99E-01       |
| 300         | 3.12E+00     | 9.99E-01       | 9.99E-01       |
| 320         | 2.86E+00     | 9.99E-01       | 9.99E-01       |
| 350         | 2.55E+00     | 9.99E-01       | 9.99E-01       |

| <b>T(K)</b> | <b>ZCT</b> | <b>SCT</b> |
|-------------|------------|------------|
| 220         | 1.79E+01   | 1.05E+02   |
| 250         | 9.57E+01   | 3.89E+02   |
| 273         | 6.74E+01   | 2.23E+01   |
| 298         | 5.02E+00   | 1.39E+01   |
| 300         | 4.91E+00   | 1.35E+01   |
| 320         | 4.08E+00   | 9.99E+00   |
| 350         | 3.26E+00   | 6.98E+00   |

## 6. Cartesian Coordinates of Stationary Points

### A. Cartesian Coordinates of Stationary Points Used in Polyrate

Presented below are the cartesian coordinates of the reactant (*react1*), product (*prod1*), and transition state (*start*) used for the tunnelling calculations on the two monomer-unit model at the  $\omega$ B97X-D(SMD=Water)/6-311+G(d,p) level of theory

The Reactant is an ion complex of the reactant molecules ( $\text{OH}^-$  and the two monomer-unit model PVC), which proceeds to the Transition State. The Product is a complex of the dehydrochlorinated reactant,  $\text{H}_2\text{O}$ , and  $\text{Cl}^-$

**REACTANT**

|    |           |           |           |
|----|-----------|-----------|-----------|
| C  | -0.075992 | -0.281413 | -1.012614 |
| C  | -0.039549 | -0.732601 | 0.433383  |
| C  | 1.324820  | -0.542506 | 1.077101  |
| C  | 1.317763  | -0.847064 | 2.559212  |
| Cl | -1.767347 | -0.355359 | -1.663959 |
| Cl | 2.564110  | -1.623016 | 0.249846  |
| O  | -0.492427 | 2.967583  | 0.725991  |
| H  | 1.697191  | 0.465324  | 0.891162  |
| H  | -0.351194 | -1.777194 | 0.522558  |
| H  | 0.974826  | -1.867419 | 2.748265  |
| H  | 2.309759  | -0.717451 | 2.994820  |
| H  | 0.631604  | -0.153349 | 3.053577  |
| H  | 0.240687  | 0.755459  | -1.116758 |
| H  | 0.519956  | -0.916704 | -1.663987 |
| H  | -0.739621 | -0.124870 | 1.016213  |
| H  | 0.012771  | 2.159184  | 0.836868  |

#### TRANSITION STATE

|    |           |           |           |
|----|-----------|-----------|-----------|
| C  | 0.025425  | -0.358385 | -1.151240 |
| C  | -0.002983 | -0.385941 | 0.348674  |
| C  | 1.286198  | -0.369833 | 0.971640  |
| C  | 1.340916  | -0.465295 | 2.468900  |
| Cl | -1.602478 | 0.100226  | -1.858254 |
| Cl | 2.455703  | -2.077783 | 0.363457  |
| O  | -0.995828 | 1.908236  | 1.189293  |
| H  | 1.990111  | 0.342426  | 0.547710  |
| H  | -0.667789 | -1.157842 | 0.746987  |
| H  | 0.748255  | -1.306183 | 2.835177  |

|   |           |           |           |
|---|-----------|-----------|-----------|
| H | 2.363294  | -0.555909 | 2.834877  |
| H | 0.913694  | 0.457631  | 2.877795  |
| H | 0.727293  | 0.384098  | -1.531338 |
| H | 0.246526  | -1.326238 | -1.602241 |
| H | -0.493353 | 0.798744  | 0.798731  |
| H | -0.629803 | 2.022243  | 2.070613  |

### PRODUCT

|    |           |           |           |
|----|-----------|-----------|-----------|
| C  | -0.102025 | -0.094621 | -0.012024 |
| C  | -0.051015 | -0.036763 | 1.471353  |
| C  | 1.092575  | 0.043875  | 2.151441  |
| C  | 1.203583  | 0.067726  | 3.640231  |
| Cl | -0.907845 | 1.402665  | -0.702126 |
| Cl | 3.211214  | 3.511935  | 3.242478  |
| O  | 0.154136  | 3.268638  | 2.600066  |
| H  | 2.027085  | 0.096437  | 1.593647  |
| H  | -1.001995 | -0.087473 | 1.998359  |
| H  | 0.222245  | 0.037426  | 4.119157  |
| H  | 1.792748  | -0.784781 | 3.993542  |
| H  | 1.728768  | 0.972933  | 3.963099  |
| H  | 0.889094  | -0.130529 | -0.459191 |
| H  | -0.708021 | -0.922500 | -0.375054 |
| H  | 0.033465  | 2.377174  | 2.255454  |
| H  | 1.109780  | 3.316346  | 2.804812  |

Presented below are the cartesian coordinates of the reactant (*react1*), product (*prod1*), and transition state (*start*) used for the tunnelling calculations on the two monomer-unit model including an explicit water molecule at the  $\omega$ B97X-D(SMD=Water)/6-311+G(d,p) level of theory



The Reactant is a complex of the reactant molecules (OH<sup>-</sup>, H<sub>2</sub>O, and the two monomer-unit model PVC), which proceeds to the Transition State. The Product is a complex of the dehydrochlorinated reactant, two H<sub>2</sub>O molecules, and Cl<sup>-</sup>

**REACTANT**

|    |           |           |           |
|----|-----------|-----------|-----------|
| C  | 0.061774  | 0.176290  | -0.000960 |
| Cl | 0.165390  | -0.245610 | 1.761657  |
| C  | 1.422316  | 0.065794  | -0.657849 |
| C  | 1.401065  | 0.456091  | -2.127292 |
| C  | 2.788133  | 0.546853  | -2.724733 |
| Cl | 0.414203  | -0.768313 | -3.084091 |
| O  | 2.481901  | 2.566760  | 1.901230  |
| O  | 1.655528  | 3.642951  | -0.295881 |
| H  | 2.116175  | 0.752645  | -0.162832 |
| H  | 2.000134  | 1.746286  | 2.030308  |
| H  | 1.963793  | 3.186291  | 0.561515  |
| H  | 0.990732  | 3.056515  | -0.664239 |
| H  | -0.327095 | 1.192812  | -0.044264 |
| H  | -0.665336 | -0.513317 | -0.424323 |
| H  | 1.822642  | -0.946392 | -0.551695 |
| H  | 0.857013  | 1.389429  | -2.272116 |
| H  | 3.328012  | -0.396116 | -2.606984 |
| H  | 2.746948  | 0.805002  | -3.784100 |
| H  | 3.341309  | 1.331170  | -2.200067 |

**PRODUCT**

|    |           |           |           |
|----|-----------|-----------|-----------|
| C  | 0.016458  | -0.115576 | -0.085023 |
| C  | 0.048595  | -0.312155 | 1.387182  |
| C  | 1.046376  | 0.130487  | 2.151365  |
| C  | 1.158289  | -0.086509 | 3.624863  |
| Cl | -1.448247 | 0.863784  | -0.591464 |
| Cl | 4.165802  | -2.468112 | 1.376058  |
| O  | -0.955588 | 2.796881  | 2.501661  |
| O  | 1.116671  | 3.457988  | 0.678947  |
| H  | 1.854451  | 0.689708  | 1.681352  |
| H  | -0.771803 | -0.877364 | 1.825262  |
| H  | 0.304621  | -0.643565 | 4.017383  |
| H  | 2.074437  | -0.637764 | 3.860032  |
| H  | 1.223508  | 0.872672  | 4.148631  |
| H  | 0.885063  | 0.429505  | -0.450227 |
| H  | -0.086637 | -1.055788 | -0.624204 |
| H  | -0.754724 | 1.853559  | 2.534419  |
| H  | -1.770959 | 2.848174  | 1.993323  |
| H  | 0.398792  | 3.243296  | 1.300609  |
| H  | 1.423888  | 2.602510  | 0.366917  |

**TRANSITION STATE**

|    |          |           |           |
|----|----------|-----------|-----------|
| C  | 0.000735 | 0.000757  | 0.001557  |
| Cl | 0.004103 | -0.018698 | 1.833246  |
| C  | 1.391390 | -0.000744 | -0.561837 |
| C  | 1.512095 | 0.488593  | -1.890669 |
| C  | 2.852204 | 0.455061  | -2.554900 |
| Cl | 0.298731 | -0.789837 | -3.279059 |
| O  | 2.761277 | 1.836148  | 0.745160  |
| O  | 0.977586 | 3.621757  | -0.170755 |
| H  | 0.906300 | 1.358090  | -2.129783 |
| H  | 1.935466 | -0.930098 | -0.376426 |

|   |           |           |           |
|---|-----------|-----------|-----------|
| H | 3.329909  | -0.520227 | -2.444476 |
| H | 2.789472  | 0.715365  | -3.610641 |
| H | 3.481794  | 1.202543  | -2.057619 |
| H | -0.552339 | 0.896842  | -0.279518 |
| H | -0.575368 | -0.881323 | -0.276399 |
| H | 2.101435  | 0.931558  | 0.071879  |
| H | 2.533934  | 1.654434  | 1.661437  |
| H | 1.646031  | 2.982705  | 0.188105  |
| H | 0.330069  | 3.065031  | -0.611116 |

## B. Cartesian Coordinates of All Structures

We present the cartesian coordinates of optimized stationary points in the basis set and functional benchmarking. The Reactant in each section is a PVC model, which reacts with the hydroxide ion, forming the studied E2 Transition State. From the Transition State, H<sub>2</sub>O, and Cl<sup>-</sup>, and the Product are formed.

### Model: 2 monomer units

Level of theory:  $\omega$ B97X-D(SMD=Water)/6-31+G(d,p)

Reactant

|    |           |           |           |
|----|-----------|-----------|-----------|
| 0  | 1         |           |           |
| C  | -0.013515 | -0.007895 | -0.008429 |
| C  | -0.019678 | 0.012715  | 1.507536  |
| Cl | 1.717084  | -0.027622 | 2.112003  |
| C  | -0.739534 | 1.230866  | 2.072149  |
| C  | -0.864225 | 1.196866  | 3.584202  |
| Cl | -1.856680 | 2.595380  | 4.177436  |
| H  | 0.452733  | 0.896026  | -0.411624 |
| H  | -1.048663 | -0.052186 | -0.362117 |
| H  | 0.517317  | -0.883200 | -0.389687 |
| H  | -0.455960 | -0.906255 | 1.903967  |

|   |           |          |          |
|---|-----------|----------|----------|
| H | -1.740952 | 1.229491 | 1.627318 |
| H | -0.232387 | 2.145582 | 1.747600 |
| H | -1.373955 | 0.295457 | 3.926415 |
| H | 0.100195  | 1.283969 | 4.083354 |

OH-

-1 1

|   |          |          |           |
|---|----------|----------|-----------|
| O | 0.000000 | 0.000000 | -0.007799 |
| H | 0.000000 | 0.000000 | 0.954799  |

Transition State

-1 1

|    |           |           |           |
|----|-----------|-----------|-----------|
| C  | 0.000000  | 0.000000  | 0.000000  |
| C  | 0.000000  | 0.000000  | 1.502978  |
| C  | 1.305100  | 0.000000  | 2.099591  |
| C  | 1.388253  | -0.074431 | 3.599121  |
| Cl | -1.632655 | 0.470871  | -0.687074 |
| Cl | 2.430798  | -1.738649 | 1.493990  |
| O  | -0.944783 | 2.320212  | 2.324319  |
| H  | 2.012804  | 0.696180  | 1.651816  |
| H  | -0.669275 | -0.757197 | 1.925714  |
| H  | 0.787070  | -0.899454 | 3.990241  |
| H  | 2.417187  | -0.180078 | 3.945932  |
| H  | 0.986907  | 0.863328  | 4.003019  |
| H  | 0.708951  | 0.724184  | -0.406228 |
| H  | 0.201014  | -0.980913 | -0.436063 |
| H  | -0.465645 | 1.201732  | 1.943586  |
| H  | -0.558954 | 2.450619  | 3.198467  |

Product

0 1

|    |           |           |           |
|----|-----------|-----------|-----------|
| C  | 0.000000  | 0.000000  | 0.000000  |
| C  | 0.000000  | 0.000000  | 1.490952  |
| C  | 1.087903  | 0.000000  | 2.251380  |
| C  | 1.035954  | 0.033177  | 3.732546  |
| Cl | 1.695180  | -1.517859 | 4.445647  |
| H  | -0.526768 | 0.875546  | -0.385350 |
| H  | 1.012594  | -0.001290 | -0.402408 |
| H  | -0.528018 | -0.876343 | -0.382286 |
| H  | -0.972706 | 0.004381  | 1.975432  |
| H  | 2.073923  | -0.008500 | 1.797946  |
| H  | 1.661616  | 0.813965  | 4.154811  |
| H  | 0.021976  | 0.124237  | 4.108997  |

H2O

0 1

|   |          |           |           |
|---|----------|-----------|-----------|
| O | 0.009066 | 0.000000  | 0.007019  |
| H | 0.007974 | -0.000000 | 0.970592  |
| H | 0.941632 | 0.000000  | -0.235461 |

Cl-

-1 1

|    |          |          |          |
|----|----------|----------|----------|
| Cl | 0.000000 | 0.000000 | 0.000000 |
|----|----------|----------|----------|

**Model: 2 monomer units**

**Level of theory:  $\omega$ B97X-D(SMD=Water)/6-31++G(d,p)**

Reactant

0 1

|    |           |           |           |
|----|-----------|-----------|-----------|
| C  | -0.013515 | -0.007895 | -0.008429 |
| C  | -0.019678 | 0.012715  | 1.507536  |
| Cl | 1.717084  | -0.027622 | 2.112003  |
| C  | -0.739534 | 1.230866  | 2.072149  |
| C  | -0.864225 | 1.196866  | 3.584202  |
| Cl | -1.856680 | 2.595380  | 4.177436  |
| H  | 0.452733  | 0.896026  | -0.411624 |
| H  | -1.048663 | -0.052186 | -0.362117 |
| H  | 0.517317  | -0.883200 | -0.389687 |
| H  | -0.455960 | -0.906255 | 1.903967  |
| H  | -1.740952 | 1.229491  | 1.627318  |
| H  | -0.232387 | 2.145582  | 1.747600  |
| H  | -1.373955 | 0.295457  | 3.926415  |
| H  | 0.100195  | 1.283969  | 4.083354  |

OH-

-1 1

|   |          |          |           |
|---|----------|----------|-----------|
| O | 0.000000 | 0.000000 | -0.007799 |
| H | 0.000000 | 0.000000 | 0.954799  |

Transition State

-1 1

|   |           |          |           |
|---|-----------|----------|-----------|
| C | -0.331891 | 0.046837 | -1.209415 |
| C | -0.360937 | 0.022348 | 0.293032  |
| C | 0.932464  | 0.033970 | 0.914606  |

|    |           |           |           |
|----|-----------|-----------|-----------|
| C  | 0.988171  | -0.061847 | 2.414190  |
| Cl | -1.958034 | 0.503832  | -1.920991 |
| Cl | 2.096946  | -1.676494 | 0.304918  |
| O  | -1.358082 | 2.314106  | 1.132119  |
| H  | 1.636789  | 0.748545  | 0.491113  |
| H  | -1.025298 | -0.752625 | 0.690513  |
| H  | 0.393188  | -0.902292 | 2.781284  |
| H  | 2.011917  | -0.156361 | 2.779091  |
| H  | 0.564027  | 0.863153  | 2.824162  |
| H  | 0.373371  | 0.788349  | -1.589982 |
| H  | -0.107246 | -0.923696 | -1.657041 |
| H  | -0.854531 | 1.209593  | 0.743811  |
| H  | -0.995322 | 2.434089  | 2.017548  |

Product

0 1

|    |           |           |           |
|----|-----------|-----------|-----------|
| C  | -0.003225 | 0.000833  | -0.007194 |
| C  | -0.003189 | -0.003238 | 1.488756  |
| C  | 1.093087  | -0.000474 | 2.252791  |
| C  | 1.039775  | 0.032777  | 3.738885  |
| Cl | 1.690582  | -1.524611 | 4.461264  |
| H  | -0.533211 | 0.879830  | -0.390965 |
| H  | 1.013163  | 0.002779  | -0.411070 |
| H  | -0.530517 | -0.879401 | -0.392322 |
| H  | -0.979346 | -0.003776 | 1.975568  |
| H  | 2.082381  | -0.003658 | 1.796541  |
| H  | 1.670793  | 0.814969  | 4.161116  |
| H  | 0.021362  | 0.131284  | 4.114297  |

H2O

0 1

|   |          |           |           |
|---|----------|-----------|-----------|
| O | 0.009066 | 0.000000  | 0.007019  |
| H | 0.007974 | -0.000000 | 0.970592  |
| H | 0.941632 | -0.000000 | -0.235461 |

Cl-

-1 1

|    |          |          |          |
|----|----------|----------|----------|
| Cl | 0.000000 | 0.000000 | 0.000000 |
|----|----------|----------|----------|

**Model: 2 monomer units**

**Level of theory:  $\omega$ B97X-D(SMD=Water)/6-311+G(d,p)**

Reactant

0 1

|    |           |           |           |
|----|-----------|-----------|-----------|
| C  | -0.016447 | -0.009191 | -0.006117 |
| C  | -0.018417 | 0.015613  | 1.507161  |
| Cl | 1.721489  | -0.018962 | 2.105414  |
| C  | -0.736319 | 1.231360  | 2.072540  |
| C  | -0.866535 | 1.193073  | 3.581797  |
| Cl | -1.853687 | 2.594850  | 4.174923  |
| H  | 0.446366  | 0.893764  | -0.412225 |
| H  | -1.051377 | -0.055587 | -0.356900 |
| H  | 0.513997  | -0.883528 | -0.386549 |
| H  | -0.447079 | -0.902398 | 1.909060  |
| H  | -1.734898 | 1.234826  | 1.624389  |



|   |           |          |          |
|---|-----------|----------|----------|
| H | -0.225999 | 2.144274 | 1.752327 |
| H | -1.383432 | 0.296009 | 3.919106 |
| H | 0.094117  | 1.275090 | 4.085198 |

OH-

-1 1

|   |          |          |           |
|---|----------|----------|-----------|
| O | 0.000000 | 0.000000 | -0.006234 |
| H | 0.000000 | 0.000000 | 0.953234  |

Transition State

-1 1

|    |           |           |           |
|----|-----------|-----------|-----------|
| C  | 0.025425  | -0.358385 | -1.151240 |
| C  | -0.002983 | -0.385941 | 0.348674  |
| C  | 1.286198  | -0.369833 | 0.971640  |
| C  | 1.340916  | -0.465295 | 2.468900  |
| Cl | -1.602478 | 0.100226  | -1.858254 |
| Cl | 2.455703  | -2.077783 | 0.363457  |
| O  | -0.995828 | 1.908236  | 1.189293  |
| H  | 1.990111  | 0.342426  | 0.547710  |
| H  | -0.667789 | -1.157842 | 0.746987  |
| H  | 0.748255  | -1.306183 | 2.835177  |
| H  | 2.363294  | -0.555909 | 2.834877  |
| H  | 0.913694  | 0.457631  | 2.877795  |
| H  | 0.727293  | 0.384098  | -1.531338 |
| H  | 0.246526  | -1.326238 | -1.602241 |
| H  | -0.493353 | 0.798744  | 0.798731  |
| H  | -0.629803 | 2.022243  | 2.070613  |

Product

O 1

C -0.001616 -0.000463 -0.003565

C -0.000759 -0.003204 1.490086

C 1.091712 0.002280 2.251648

C 1.037866 0.035265 3.735195

Cl 1.682978 -1.527087 4.451996

H -0.533825 0.875952 -0.386944

H 1.013271 0.003485 -0.407584

H -0.527367 -0.880888 -0.387107

H -0.975477 -0.005211 1.977112

H 2.080172 0.001247 1.796545

H 1.672845 0.810987 4.158988

H 0.021853 0.134952 4.111297

H2O

O 1

O 0.009010 0.000000 0.006975

H 0.010130 -0.000000 0.967865

H 0.939532 0.000000 -0.232691

Cl-

-1 1

Cl 0.000000 0.000000 0.000000

**Model: 2 monomer units**

**Level of theory:  $\omega$ B97X-D(SMD=Water)/6-311++G(d,p)**

Reactant

0 1

C -0.017301 -0.009838 -0.005992

C -0.017372 0.016232 1.507288

Cl 1.723546 -0.015141 2.103134

C -0.735456 1.231915 2.072435

C -0.868060 1.192024 3.581407

Cl -1.850236 2.597272 4.174607

H 0.442062 0.894368 -0.413196

H -1.052549 -0.059886 -0.355330

H 0.515553 -0.882827 -0.386139

H -0.443987 -0.902044 1.910720

H -1.733581 1.236702 1.623236

H -0.223636 2.144651 1.754342

H -1.389278 0.296782 3.916925

H 0.092074 1.268983 4.086688

OH-

-1 1

O 0.000000 0.000000 -0.006234

H 0.000000 0.000000 0.953234

Transition State

-1 1

C 0.025253 -0.358047 -1.150849

|    |           |           |           |
|----|-----------|-----------|-----------|
| C  | -0.003397 | -0.386158 | 0.349039  |
| C  | 1.285778  | -0.369690 | 0.971854  |
| C  | 1.340602  | -0.465719 | 2.469075  |
| Cl | -1.603562 | 0.096662  | -1.858025 |
| Cl | 2.455971  | -2.077117 | 0.363294  |
| O  | -0.993808 | 1.909724  | 1.187977  |
| H  | 1.989442  | 0.342817  | 0.547926  |
| H  | -0.668265 | -1.157971 | 0.747272  |
| H  | 0.747279  | -1.306332 | 2.834904  |
| H  | 2.363018  | -0.557373 | 2.834633  |
| H  | 0.914187  | 0.457309  | 2.878570  |
| H  | 0.725325  | 0.386242  | -1.530779 |
| H  | 0.249006  | -1.325173 | -1.602225 |
| H  | -0.493081 | 0.799236  | 0.798221  |
| H  | -0.628567 | 2.021784  | 2.069894  |

Product

0 1

|    |           |           |           |
|----|-----------|-----------|-----------|
| C  | -0.001616 | -0.000463 | -0.003565 |
| C  | -0.000759 | -0.003204 | 1.490086  |
| C  | 1.091712  | 0.002280  | 2.251648  |
| C  | 1.037866  | 0.035265  | 3.735195  |
| Cl | 1.682978  | -1.527087 | 4.451996  |
| H  | -0.533825 | 0.875952  | -0.386944 |
| H  | 1.013271  | 0.003485  | -0.407584 |
| H  | -0.527367 | -0.880888 | -0.387107 |
| H  | -0.975477 | -0.005211 | 1.977112  |
| H  | 2.080172  | 0.001247  | 1.796545  |

|   |          |          |          |
|---|----------|----------|----------|
| H | 1.672845 | 0.810987 | 4.158988 |
| H | 0.021853 | 0.134952 | 4.111297 |

H2O

0 1

|   |          |           |           |
|---|----------|-----------|-----------|
| O | 0.009010 | 0.000000  | 0.006975  |
| H | 0.010130 | -0.000000 | 0.967865  |
| H | 0.939532 | 0.000000  | -0.232691 |

Cl-

-1 1

|    |          |          |          |
|----|----------|----------|----------|
| Cl | 0.000000 | 0.000000 | 0.000000 |
|----|----------|----------|----------|

**Model: 2 monomer units**

**Level of theory:  $\omega$ B97X-D(SMD=Water)/aug-cc-pVTZ**

Reactant

0 1

|    |           |           |           |
|----|-----------|-----------|-----------|
| C  | -2.170215 | 1.505460  | -0.097031 |
| C  | -1.214367 | 0.434888  | 0.374199  |
| H  | -2.201548 | 1.548121  | -1.185830 |
| H  | -3.175667 | 1.329298  | 0.280320  |
| H  | -1.826523 | 2.471094  | 0.276864  |
| H  | -1.212874 | 0.368581  | 1.459292  |
| Cl | -1.847215 | -1.202453 | -0.159563 |
| C  | 0.196358  | 0.639557  | -0.148016 |
| C  | 1.186570  | -0.350996 | 0.421758  |

|    |          |           |           |
|----|----------|-----------|-----------|
| H  | 0.195798 | 0.597154  | -1.238041 |
| H  | 0.490082 | 1.649825  | 0.143629  |
| Cl | 2.865754 | 0.033642  | -0.132156 |
| H  | 1.212620 | -0.315773 | 1.507111  |
| H  | 0.993438 | -1.367033 | 0.093888  |

OH-

-1 1

|   |          |          |           |
|---|----------|----------|-----------|
| O | 0.000000 | 0.000000 | 0.105693  |
| H | 0.000000 | 0.000000 | -0.852970 |

Transition State

-1 1

|    |           |           |           |
|----|-----------|-----------|-----------|
| C  | 0.126652  | 0.266986  | -0.311947 |
| C  | -1.194233 | 0.392619  | 0.221695  |
| C  | 0.995129  | -0.735386 | 0.379649  |
| H  | -1.241899 | 0.434420  | 1.304421  |
| C  | -2.132104 | 1.341260  | -0.463588 |
| H  | 0.149033  | 0.170032  | -1.398246 |
| H  | -3.135925 | 1.288724  | -0.049980 |
| H  | -1.753947 | 2.355623  | -0.313535 |
| H  | -2.173856 | 1.149804  | -1.535190 |
| Cl | 2.779055  | -0.417239 | 0.091543  |
| H  | 0.872107  | -0.702632 | 1.459422  |
| H  | 0.856344  | -1.756950 | 0.033725  |
| Cl | -2.251888 | -1.453093 | 0.110783  |
| H  | 0.623630  | 1.509542  | -0.037916 |
| O  | 1.138748  | 2.641999  | 0.201169  |

H 2.074312 2.436671 0.267364

Product

O 1

C 0.257197 -3.012345 0.000000

H 1.077823 -3.727488 0.000000

H -0.357943 -3.211057 0.879180

C 0.770575 -1.600087 0.000000

H -0.357943 -3.211057 -0.879180

C -0.002610 -0.523779 0.000000

H 1.848717 -1.466730 0.000000

C 0.553103 0.871035 0.000000

H -1.082885 -0.626436 0.000000

Cl -0.762618 2.110146 0.000000

H 1.150934 1.075986 0.883977

H 1.150934 1.075986 -0.883977

H2O

O 1

H 0.000000 0.758695 -0.467425

O 0.000000 -0.000000 0.120719

H -0.000000 -0.758695 -0.467425

Cl-

-1 1

Cl 0.000000 0.000000 0.000000

**Model: 2 monomer units**

**Level of theory:  $\omega$ B97X-D(SMD=Water)/def2-TZVPPD**

Reactant

0 1

|    |           |           |           |
|----|-----------|-----------|-----------|
| C  | -2.170203 | 1.504232  | -0.097590 |
| C  | -1.214694 | 0.432154  | 0.373150  |
| H  | -2.203309 | 1.546801  | -1.186691 |
| H  | -3.175956 | 1.329858  | 0.281245  |
| H  | -1.825110 | 2.469975  | 0.275620  |
| H  | -1.211853 | 0.370818  | 1.459245  |
| Cl | -1.845125 | -1.199990 | -0.155595 |
| C  | 0.196733  | 0.639881  | -0.148342 |
| C  | 1.188606  | -0.350513 | 0.419942  |
| H  | 0.197102  | 0.600069  | -1.238874 |
| H  | 0.489127  | 1.650206  | 0.145666  |
| Cl | 2.863138  | 0.032464  | -0.129395 |
| H  | 1.210539  | -0.317781 | 1.506197  |
| H  | 0.993216  | -1.366808 | 0.091847  |

OH-

-1 1

|   |          |          |           |
|---|----------|----------|-----------|
| O | 0.000000 | 0.000000 | 0.105139  |
| H | 0.000000 | 0.000000 | -0.852416 |

Transition State

-1 1

|   |          |          |           |
|---|----------|----------|-----------|
| C | 0.126803 | 0.267311 | -0.311663 |
|---|----------|----------|-----------|



|    |           |           |           |
|----|-----------|-----------|-----------|
| C  | -1.197099 | 0.386152  | 0.221264  |
| C  | 0.996892  | -0.735480 | 0.378632  |
| H  | -1.242374 | 0.434629  | 1.304470  |
| C  | -2.133051 | 1.339281  | -0.462874 |
| H  | 0.148683  | 0.168737  | -1.398381 |
| H  | -3.138336 | 1.287067  | -0.051533 |
| H  | -1.754716 | 2.353346  | -0.310025 |
| H  | -2.173968 | 1.150836  | -1.535437 |
| Cl | 2.775230  | -0.423248 | 0.086959  |
| H  | 0.874356  | -0.701433 | 1.459117  |
| H  | 0.853262  | -1.758537 | 0.036631  |
| Cl | -2.245477 | -1.445631 | 0.109076  |
| H  | 0.628557  | 1.518232  | -0.035918 |
| O  | 1.138338  | 2.640823  | 0.202811  |
| H  | 2.074060  | 2.440297  | 0.266238  |

Product

0 1

|    |           |           |           |
|----|-----------|-----------|-----------|
| C  | -0.000309 | -0.000001 | -0.000775 |
| C  | -0.000248 | 0.000200  | 1.490273  |
| C  | 1.088053  | 0.000099  | 2.251069  |
| C  | 1.036754  | 0.033076  | 3.733076  |
| Cl | 1.698679  | -1.509004 | 4.446325  |
| H  | -0.526646 | 0.876141  | -0.386167 |
| H  | 1.012465  | -0.002077 | -0.403530 |
| H  | -0.529216 | -0.876220 | -0.382912 |
| H  | -0.973371 | 0.004605  | 1.974879  |
| H  | 2.074445  | -0.007936 | 1.797234  |

|   |          |          |          |
|---|----------|----------|----------|
| H | 1.658668 | 0.819088 | 4.152809 |
| H | 0.021774 | 0.123810 | 4.108522 |

H2O

0 1

|   |           |           |           |
|---|-----------|-----------|-----------|
| H | 0.000000  | 0.758384  | -0.466808 |
| O | -0.000000 | 0.000000  | 0.119487  |
| H | -0.000000 | -0.758384 | -0.466808 |

Cl-

-1 1

|    |          |          |          |
|----|----------|----------|----------|
| Cl | 0.000000 | 0.000000 | 0.000000 |
|----|----------|----------|----------|

### Model: 2 monomer units

Level of theory:  $\omega$ B97X-D(SMD=Water)/def2-QZVPPD

Reactant

0 1

|    |           |           |           |
|----|-----------|-----------|-----------|
| C  | -2.169628 | 1.504353  | -0.097118 |
| C  | -1.214945 | 0.431321  | 0.372523  |
| H  | -2.202634 | 1.547902  | -1.185359 |
| H  | -3.174703 | 1.330159  | 0.281132  |
| H  | -1.824366 | 2.468800  | 0.276740  |
| H  | -1.212307 | 0.369068  | 1.457742  |
| Cl | -1.845530 | -1.198832 | -0.157549 |
| C  | 0.196313  | 0.639369  | -0.148544 |
| C  | 1.188623  | -0.349793 | 0.420549  |

|    |          |           |           |
|----|----------|-----------|-----------|
| H  | 0.196981 | 0.598571  | -1.238264 |
| H  | 0.488044 | 1.649284  | 0.144480  |
| Cl | 2.861733 | 0.032317  | -0.130306 |
| H  | 1.211359 | -0.315260 | 1.505870  |
| H  | 0.993269 | -1.365891 | 0.094527  |

OH-

-1 1

|   |          |          |           |
|---|----------|----------|-----------|
| O | 0.000000 | 0.000000 | 0.104901  |
| H | 0.000000 | 0.000000 | -0.852178 |

Transition State

-1 1

|    |           |           |           |
|----|-----------|-----------|-----------|
| C  | 0.126403  | 0.266948  | -0.312133 |
| C  | -1.197074 | 0.385601  | 0.220802  |
| C  | 0.996891  | -0.734956 | 0.378260  |
| H  | -1.241769 | 0.435318  | 1.303246  |
| C  | -2.132444 | 1.338991  | -0.463542 |
| H  | 0.148073  | 0.167639  | -1.398093 |
| H  | -3.136913 | 1.287605  | -0.052240 |
| H  | -1.753851 | 2.352180  | -0.311701 |
| H  | -2.173918 | 1.149829  | -1.535159 |
| Cl | 2.774110  | -0.422847 | 0.085690  |
| H  | 0.874997  | -0.700158 | 1.458009  |
| H  | 0.853565  | -1.757644 | 0.037479  |
| Cl | -2.244931 | -1.443787 | 0.110274  |
| H  | 0.628229  | 1.518959  | -0.035417 |
| O  | 1.137423  | 2.640137  | 0.205196  |

H 2.072370 2.438566 0.268698

Product

O 1

C 0.001056 -0.002208 0.001983

C 0.003374 -0.009372 1.492641

C 1.092236 0.003156 2.250950

C 1.042688 0.028503 3.732793

Cl 1.727954 -1.506346 4.437390

H -0.538544 0.867182 -0.377870

H 1.012329 0.012869 -0.401990

H -0.514859 -0.883701 -0.383297

H -0.968204 -0.021868 1.978468

H 2.077229 0.012141 1.795923

H 1.653281 0.820780 4.155032

H 0.027895 0.102364 4.109959

H2O

O 1

H 0.000000 0.757767 -0.466831

O -0.000000 -0.000000 0.119531

H -0.000000 -0.757767 -0.466831

Cl-

-1 1

Cl 0.000000 0.000000 0.000000

**Model: 2 monomer units**

**Level of theory: M06-2X(SMD=Water)/6-311+G(d,p)**

Reactant

0 1

|    |           |           |           |
|----|-----------|-----------|-----------|
| C  | -0.002804 | -0.001138 | 0.001710  |
| C  | 0.000434  | 0.001762  | 1.515100  |
| Cl | 1.738992  | 0.006185  | 2.098163  |
| C  | -0.733765 | 1.198734  | 2.096993  |
| C  | -0.823506 | 1.149504  | 3.608668  |
| Cl | -1.830563 | 2.522610  | 4.221731  |
| H  | 0.446760  | 0.915732  | -0.385432 |
| H  | -1.037036 | -0.057337 | -0.347099 |
| H  | 0.542852  | -0.859508 | -0.390733 |
| H  | -0.407274 | -0.927948 | 1.910872  |
| H  | -1.742984 | 1.182530  | 1.674590  |
| H  | -0.247854 | 2.122461  | 1.771205  |
| H  | -1.308959 | 0.238590  | 3.954026  |
| H  | 0.146790  | 1.256350  | 4.086811  |

OH-

-1 1

|   |          |          |           |
|---|----------|----------|-----------|
| O | 0.000000 | 0.000000 | -0.007018 |
| H | 0.000000 | 0.000000 | 0.954018  |

Transition State

-1 1

|   |          |          |          |
|---|----------|----------|----------|
| C | 0.001994 | 0.000209 | 0.002035 |
|---|----------|----------|----------|

|    |           |           |           |
|----|-----------|-----------|-----------|
| C  | 0.000513  | -0.001682 | 1.501221  |
| C  | 1.326452  | 0.002003  | 2.080332  |
| C  | 1.399902  | -0.059508 | 3.584436  |
| Cl | -1.628000 | 0.504315  | -0.672343 |
| Cl | 2.418230  | -1.633002 | 1.486235  |
| O  | -0.916336 | 2.340925  | 2.294581  |
| H  | 1.991430  | 0.748534  | 1.649067  |
| H  | -0.638621 | -0.786550 | 1.916213  |
| H  | 0.830833  | -0.909564 | 3.965627  |
| H  | 2.428043  | -0.128350 | 3.938022  |
| H  | 0.957630  | 0.858628  | 3.984463  |
| H  | 0.715410  | 0.718790  | -0.401598 |
| H  | 0.179662  | -0.975671 | -0.450553 |
| H  | -0.477383 | 1.219096  | 1.938899  |
| H  | -0.536622 | 2.477236  | 3.169192  |

Product

0 1

|    |          |           |           |
|----|----------|-----------|-----------|
| C  | 0.001183 | 0.000329  | -0.004386 |
| Cl | 0.009516 | 0.011877  | 1.826394  |
| C  | 1.389976 | -0.000404 | -0.532964 |
| C  | 1.896028 | 1.020898  | -1.222068 |
| C  | 3.274507 | 1.057141  | -1.799465 |
| H  | 1.270397 | 1.896911  | -1.387874 |
| H  | 1.987150 | -0.889793 | -0.344348 |
| H  | 3.820316 | 0.137369  | -1.583415 |
| H  | 3.234220 | 1.195131  | -2.883525 |
| H  | 3.836719 | 1.903073  | -1.393892 |

|   |           |           |           |
|---|-----------|-----------|-----------|
| H | -0.553287 | 0.885722  | -0.305431 |
| H | -0.549124 | -0.899644 | -0.269301 |

H2O

0 1

|   |          |           |           |
|---|----------|-----------|-----------|
| O | 0.007886 | 0.000000  | 0.006105  |
| H | 0.010106 | -0.000000 | 0.969057  |
| H | 0.940680 | 0.000000  | -0.233012 |

Cl-

-1 1

|    |          |          |          |
|----|----------|----------|----------|
| Cl | 0.000000 | 0.000000 | 0.000000 |
|----|----------|----------|----------|

### **Model: 2 monomer units**

**Level of theory: M06-2X(SMD=Water)/6-31+G(d,p)**

Reactant

0 1

|    |           |           |           |
|----|-----------|-----------|-----------|
| C  | 0.000251  | -0.004666 | 0.001561  |
| C  | 0.001318  | 0.011257  | 1.516792  |
| C  | 1.407871  | 0.011310  | 2.097540  |
| C  | 1.416309  | 0.123331  | 3.610162  |
| Cl | 3.114078  | 0.262173  | 4.221967  |
| Cl | -0.914441 | -1.457191 | 2.122366  |
| H  | 0.541042  | -0.877387 | -0.375790 |
| H  | 0.499785  | 0.899590  | -0.360061 |

|   |           |           |           |
|---|-----------|-----------|-----------|
| H | -1.018487 | -0.018938 | -0.391356 |
| H | -0.571196 | 0.858773  | 1.899519  |
| H | 1.923905  | 0.877497  | 1.667657  |
| H | 1.940359  | -0.890582 | 1.776456  |
| H | 0.893149  | 1.017792  | 3.950636  |
| H | 0.994122  | -0.756578 | 4.093973  |

OH-

-1 1

|   |          |          |           |
|---|----------|----------|-----------|
| O | 0.000000 | 0.000000 | -0.008722 |
| H | 0.000000 | 0.000000 | 0.955722  |

Transition State

-1 1

|    |           |           |           |
|----|-----------|-----------|-----------|
| C  | -0.008044 | 0.016105  | 0.016670  |
| Cl | -0.009052 | -0.200718 | 1.838214  |
| C  | 1.383750  | -0.010921 | -0.543984 |
| C  | 1.479501  | 0.538043  | -1.881518 |
| Cl | 0.283333  | -0.474257 | -3.209955 |
| C  | 2.841174  | 0.486303  | -2.529310 |
| O  | 2.833278  | 1.705869  | 0.837105  |
| H  | 0.988852  | 1.506121  | -1.993961 |
| H  | 1.845262  | -1.002127 | -0.461882 |
| H  | 3.239647  | -0.531912 | -2.515969 |
| H  | 2.816053  | 0.848065  | -3.558511 |
| H  | 3.517246  | 1.128891  | -1.953023 |
| H  | -0.497214 | 0.976403  | -0.162211 |
| H  | -0.655691 | -0.786787 | -0.343835 |



|   |          |          |          |
|---|----------|----------|----------|
| H | 2.163112 | 0.886298 | 0.166389 |
| H | 3.541780 | 1.991221 | 0.244688 |

Product

0 1

|    |           |           |           |
|----|-----------|-----------|-----------|
| C  | -0.000000 | -0.000000 | 0.000000  |
| C  | 0.000000  | 0.000000  | 1.487786  |
| C  | 1.125505  | 0.000000  | 2.207577  |
| C  | 1.178818  | -0.032167 | 3.702715  |
| Cl | -0.713397 | 1.555682  | -0.650634 |
| H  | 2.080827  | 0.020059  | 1.680891  |
| H  | -0.971347 | -0.015022 | 1.981405  |
| H  | 0.175702  | -0.051792 | 4.136640  |
| H  | 1.728202  | -0.913185 | 4.051283  |
| H  | 1.709957  | 0.845231  | 4.087249  |
| H  | 1.007541  | -0.063230 | -0.410171 |
| H  | -0.626687 | -0.786923 | -0.419447 |

H2O

0 1

|   |          |           |           |
|---|----------|-----------|-----------|
| O | 0.008781 | 0.000000  | 0.006798  |
| H | 0.006807 | -0.000000 | 0.972395  |
| H | 0.943085 | 0.000000  | -0.237042 |

Cl-

-1 1

|    |          |          |          |
|----|----------|----------|----------|
| Cl | 0.000000 | 0.000000 | 0.000000 |
|----|----------|----------|----------|

**Model: 3 monomer units**

**Level of theory:  $\omega$ B97X-D(SMD=Water)/6-31+G(d,p)**

Reactant

0 1

|    |           |           |           |
|----|-----------|-----------|-----------|
| C  | 1.447656  | 0.079972  | -1.235176 |
| C  | 0.391790  | 0.160843  | -0.141234 |
| C  | -1.006370 | -0.065611 | -0.703767 |
| C  | -2.123759 | -0.041843 | 0.335037  |
| Cl | -3.706319 | -0.300479 | -0.557863 |
| Cl | 0.480700  | 1.795362  | 0.687529  |
| C  | 2.887213  | 0.232226  | -0.787473 |
| H  | 1.260304  | 0.858699  | -1.983998 |
| H  | 1.320836  | -0.886379 | -1.735632 |
| H  | 0.613749  | -0.552904 | 0.653548  |
| H  | -0.991440 | -1.052179 | -1.182268 |
| H  | -1.205388 | 0.678787  | -1.481215 |
| C  | -1.994564 | -1.086010 | 1.426575  |
| H  | -2.229953 | 0.954208  | 0.766102  |
| H  | -1.118168 | -0.862994 | 2.043737  |
| H  | -2.869489 | -1.077452 | 2.080498  |
| H  | -1.874774 | -2.087237 | 1.001569  |
| Cl | 3.393649  | -1.081992 | 0.363207  |
| H  | 3.561187  | 0.158779  | -1.639700 |
| H  | 3.064835  | 1.172056  | -0.265234 |

Transition State

-1 1

|    |           |           |           |
|----|-----------|-----------|-----------|
| C  | -0.030768 | -0.012045 | 0.029840  |
| C  | -0.009891 | 0.018922  | 1.543713  |
| C  | 1.347650  | 0.012906  | 2.209825  |
| C  | 1.344545  | -0.032372 | 3.645789  |
| C  | 2.689578  | 0.073250  | 4.327664  |
| Cl | 2.448292  | -0.243669 | 6.138552  |
| Cl | 0.730625  | -1.526728 | -0.633619 |
| C  | 3.757259  | -0.873263 | 3.811923  |
| Cl | 2.256321  | 1.806884  | 1.492842  |
| O  | 0.415582  | -2.453610 | 4.111199  |
| H  | -0.573054 | 0.903364  | 1.861192  |
| H  | -0.552127 | -0.854484 | 1.926009  |
| H  | 2.069681  | -0.639495 | 1.722705  |
| H  | 0.849879  | -1.299215 | 3.861923  |
| H  | 0.615685  | 0.657558  | 4.085085  |
| H  | 3.067718  | 1.099318  | 4.321445  |
| H  | 4.022068  | -0.594425 | 2.786836  |
| H  | 4.665232  | -0.808320 | 4.416399  |
| H  | 3.401783  | -1.908084 | 3.809891  |
| H  | -1.055203 | -0.009944 | -0.339938 |
| H  | 0.522779  | 0.817017  | -0.408139 |
| H  | -0.227554 | -2.621009 | 3.412439  |

Product

0 1

|    |          |          |          |
|----|----------|----------|----------|
| C  | 0.006344 | 0.016802 | 0.019734 |
| Cl | 0.050256 | 0.018050 | 1.839545 |

|    |           |           |           |
|----|-----------|-----------|-----------|
| C  | 1.398666  | -0.012122 | -0.592023 |
| C  | 2.169417  | -1.265379 | -0.295487 |
| C  | 2.541921  | -2.141112 | -1.231170 |
| C  | 3.283016  | -3.417309 | -0.974705 |
| C  | 3.588318  | -3.753258 | 0.470180  |
| Cl | 4.872665  | -3.342978 | -1.922679 |
| H  | 1.261454  | 0.095869  | -1.674366 |
| H  | 1.960041  | 0.863387  | -0.244926 |
| H  | 2.417246  | -1.444640 | 0.749263  |
| H  | 2.287882  | -1.953453 | -2.273789 |
| H  | 2.757384  | -4.245387 | -1.453950 |
| H  | 2.646473  | -3.857910 | 1.017971  |
| H  | 4.126954  | -4.701011 | 0.534976  |
| H  | 4.186740  | -2.973776 | 0.949423  |
| H  | -0.526777 | 0.923831  | -0.263290 |
| H  | -0.578433 | -0.858544 | -0.263890 |

**Model: 3 monomer units**

**Level of theory:  $\omega$ B97X-D(SMD=Water)/6-311+G(d,p)**

Reactant

0 1

|    |           |           |           |
|----|-----------|-----------|-----------|
| C  | -0.001055 | 0.002229  | 0.003963  |
| Cl | 0.022362  | 0.059227  | 1.822080  |
| C  | 1.392528  | -0.003628 | -0.584734 |
| C  | 2.268316  | -1.191799 | -0.221487 |
| Cl | 1.480351  | -2.743563 | -0.804856 |

|    |           |           |           |
|----|-----------|-----------|-----------|
| C  | 3.660811  | -1.056340 | -0.819266 |
| C  | 4.615691  | -2.192565 | -0.475430 |
| C  | 4.857890  | -2.387712 | 1.005825  |
| Cl | 6.213881  | -1.830292 | -1.302255 |
| H  | 1.283472  | 0.050368  | -1.673184 |
| H  | 1.925508  | 0.898812  | -0.269589 |
| H  | 2.316739  | -1.313244 | 0.859671  |
| H  | 4.073924  | -0.119519 | -0.429670 |
| H  | 3.576759  | -0.956223 | -1.904702 |
| H  | 4.293905  | -3.122952 | -0.940022 |
| H  | 3.934372  | -2.724790 | 1.485291  |
| H  | 5.617668  | -3.151133 | 1.180296  |
| H  | 5.173266  | -1.453955 | 1.478734  |
| H  | -0.546822 | 0.887725  | -0.312344 |
| H  | -0.569705 | -0.887737 | -0.257337 |

#### Transition State

-1 1

|    |           |           |           |
|----|-----------|-----------|-----------|
| C  | -0.057668 | 0.121067  | -0.036631 |
| C  | -0.042044 | 0.080297  | 1.474730  |
| C  | 1.310380  | 0.025199  | 2.144178  |
| C  | 1.300043  | -0.062398 | 3.574149  |
| C  | 2.637991  | -0.025146 | 4.270082  |
| Cl | 2.371483  | -0.472870 | 6.053287  |
| Cl | 0.691710  | -1.368790 | -0.767496 |
| C  | 3.694296  | -0.948781 | 3.700330  |
| Cl | 2.262138  | 1.821732  | 1.490025  |
| O  | 0.332287  | -2.479384 | 3.953043  |

|   |           |           |           |
|---|-----------|-----------|-----------|
| H | -0.594325 | 0.954544  | 1.832891  |
| H | -0.594578 | -0.802729 | 1.814006  |
| H | 2.021495  | -0.622600 | 1.639581  |
| H | 0.787645  | -1.318296 | 3.745075  |
| H | 0.583913  | 0.623842  | 4.034896  |
| H | 3.029386  | 0.990644  | 4.348883  |
| H | 3.974002  | -0.602949 | 2.701129  |
| H | 4.595101  | -0.942458 | 4.316454  |
| H | 3.321301  | -1.973343 | 3.621748  |
| H | -1.078453 | 0.148451  | -0.410394 |
| H | 0.506198  | 0.960967  | -0.434219 |
| H | 0.785972  | -2.753543 | 4.754795  |

Product

0 1

|    |           |           |           |
|----|-----------|-----------|-----------|
| C  | 0.003816  | 0.001788  | 0.004748  |
| C  | 0.001703  | 0.001365  | 1.523438  |
| C  | 1.371120  | 0.002052  | 2.132980  |
| C  | 1.851398  | 1.005062  | 2.862740  |
| C  | 3.221285  | 1.057533  | 3.459547  |
| Cl | 3.022470  | 1.215258  | 5.294882  |
| Cl | 0.727667  | -1.520458 | -0.683184 |
| C  | 4.142853  | -0.104291 | 3.164961  |
| H  | -0.545229 | 0.898210  | 1.832525  |
| H  | -0.565128 | -0.865369 | 1.879546  |
| H  | 1.984069  | -0.875919 | 1.944279  |
| H  | 1.232200  | 1.880929  | 3.045729  |
| H  | 3.698148  | 2.000454  | 3.192663  |

|   |           |           |           |
|---|-----------|-----------|-----------|
| H | 4.309747  | -0.162003 | 2.085783  |
| H | 5.108304  | 0.043137  | 3.650915  |
| H | 3.718681  | -1.052159 | 3.503133  |
| H | -1.008617 | 0.048601  | -0.390206 |
| H | 0.596680  | 0.820236  | -0.399719 |

**Model: 3 monomer units**

**Level of theory:  $\omega$ B97X-D(SMD=Water)/def2-TZVPPD**

Reactant

0 1

|    |          |           |           |
|----|----------|-----------|-----------|
| C  | 0.000000 | 0.000000  | 0.000000  |
| Cl | 0.000000 | 0.000000  | 1.807869  |
| C  | 1.397731 | 0.000000  | -0.572852 |
| C  | 2.258174 | -1.203353 | -0.233460 |
| Cl | 1.469472 | -2.724615 | -0.858230 |
| C  | 3.655137 | -1.064280 | -0.814995 |
| C  | 4.606057 | -2.199095 | -0.466867 |
| C  | 4.878662 | -2.361410 | 1.010948  |
| Cl | 6.179657 | -1.880098 | -1.331121 |
| H  | 1.302576 | 0.084938  | -1.658249 |
| H  | 1.932589 | 0.886976  | -0.227085 |
| H  | 2.296114 | -1.347397 | 0.843220  |
| H  | 4.065363 | -0.129879 | -0.423691 |
| H  | 3.580593 | -0.963646 | -1.898458 |
| H  | 4.259816 | -3.134990 | -0.896697 |
| H  | 3.962303 | -2.662418 | 1.521343  |

|   |           |           |           |
|---|-----------|-----------|-----------|
| H | 5.624342  | -3.134992 | 1.186036  |
| H | 5.226595  | -1.425295 | 1.449246  |
| H | -0.534247 | 0.896672  | -0.297667 |
| H | -0.571071 | -0.874206 | -0.298305 |

Transition State

-1 1

|    |           |           |           |
|----|-----------|-----------|-----------|
| C  | 0.004259  | -0.000013 | -0.002218 |
| C  | 0.003095  | -0.002341 | 1.507538  |
| C  | 1.349141  | -0.003179 | 2.189422  |
| C  | 1.323394  | -0.087256 | 3.620824  |
| C  | 2.651522  | 0.007111  | 4.325466  |
| Cl | 2.387261  | -0.352574 | 6.114591  |
| Cl | 0.783262  | -1.484621 | -0.684414 |
| C  | 3.728724  | -0.918902 | 3.805433  |
| Cl | 2.235852  | 1.779234  | 1.532252  |
| O  | 0.403925  | -2.527123 | 4.011567  |
| H  | -0.574167 | 0.863891  | 1.837486  |
| H  | -0.531678 | -0.888135 | 1.859670  |
| H  | 2.074875  | -0.645090 | 1.702843  |
| H  | 0.825715  | -1.380343 | 3.801600  |
| H  | 0.586918  | 0.585221  | 4.064629  |
| H  | 3.027254  | 1.029828  | 4.352685  |
| H  | 4.003741  | -0.619911 | 2.792569  |
| H  | 4.624981  | -0.861898 | 4.421376  |
| H  | 3.380635  | -1.952023 | 3.777940  |
| H  | -1.010457 | 0.002708  | -0.387625 |
| H  | 0.555300  | 0.839866  | -0.412386 |



H -0.223282 -2.676179 3.301690

Product

O 1

C 0.005300 -0.000074 0.006630

C 0.006479 0.001948 1.523434

C 1.373976 0.005788 2.129961

C 1.852008 1.002950 2.862313

C 3.219659 1.056117 3.458847

Cl 3.023539 1.221545 5.281598

Cl 0.732629 -1.507457 -0.680071

C 4.137791 -0.105817 3.167384

H -0.541487 0.894768 1.833640

H -0.555616 -0.865039 1.879106

H 1.987844 -0.867180 1.935445

H 1.232112 1.874046 3.051225

H 3.697690 1.994090 3.184470

H 4.305013 -0.168297 2.090989

H 5.100655 0.040771 3.653178

H 3.712574 -1.049458 3.508080

H -1.007111 0.042970 -0.383210

H 0.588112 0.822756 -0.398258

**Model: 4 monomer units**

**Level of theory:  $\omega$ B97X-D(SMD=Water)/6-31+G(d,p)**

Reactant

0 1

|    |           |           |           |
|----|-----------|-----------|-----------|
| C  | 4.014084  | 0.036647  | -0.136099 |
| Cl | 3.804792  | 1.796091  | -0.545438 |
| C  | 2.849945  | -0.806381 | -0.615675 |
| C  | 1.489185  | -0.476662 | -0.017170 |
| Cl | 1.539413  | -0.695719 | 1.802977  |
| C  | 0.399130  | -1.354870 | -0.621652 |
| C  | -1.011630 | -1.093696 | -0.099471 |
| Cl | -2.115620 | -2.337898 | -0.868725 |
| C  | -1.519877 | 0.310398  | -0.401767 |
| C  | -2.928877 | 0.599889  | 0.108117  |
| C  | -3.093843 | 0.463070  | 1.608950  |
| Cl | -3.347277 | 2.316810  | -0.387018 |
| H  | -1.467488 | 0.485379  | -1.481081 |
| H  | -0.834455 | 1.015278  | 0.082696  |
| H  | -1.068328 | -1.314554 | 0.966730  |
| H  | 0.416681  | -1.175759 | -1.703048 |
| H  | 0.656467  | -2.405390 | -0.454460 |
| H  | 1.265870  | 0.582444  | -0.151994 |
| H  | 3.100766  | -1.852047 | -0.401363 |
| H  | 2.755125  | -0.713131 | -1.703132 |
| H  | -3.665512 | -0.007633 | -0.418369 |
| H  | 4.936199  | -0.276175 | -0.623755 |
| H  | 4.143969  | -0.005967 | 0.944919  |
| H  | -2.345158 | 1.057009  | 2.142202  |
| H  | -4.091237 | 0.778941  | 1.922866  |
| H  | -2.973840 | -0.586597 | 1.895833  |

Transition State

-1 1

|    |           |           |           |
|----|-----------|-----------|-----------|
| C  | -0.049941 | 0.034980  | -0.070018 |
| Cl | -0.221285 | 0.197821  | 1.734929  |
| C  | 1.400364  | -0.011852 | -0.503793 |
| C  | 2.248353  | 1.201499  | -0.192187 |
| C  | 3.633693  | 1.105832  | -0.566091 |
| C  | 4.483475  | 2.343914  | -0.380231 |
| Cl | 6.240936  | 1.888389  | -0.747343 |
| C  | 4.398434  | 2.955819  | 1.013650  |
| C  | 5.277435  | 4.183351  | 1.232056  |
| C  | 4.982959  | 5.343661  | 0.301889  |
| Cl | 5.031286  | 4.733481  | 2.968171  |
| Cl | 1.278295  | 2.777723  | -1.231570 |
| O  | 4.547154  | -0.711147 | 1.099629  |
| H  | 4.634699  | 2.188837  | 1.758158  |
| H  | 3.356153  | 3.259014  | 1.165538  |
| H  | 4.268274  | 3.095794  | -1.143732 |
| H  | 4.092280  | 0.147029  | 0.314438  |
| H  | 3.765863  | 0.690606  | -1.570988 |
| H  | 2.054073  | 1.619562  | 0.793287  |
| H  | 1.412380  | -0.203700 | -1.582422 |
| H  | 1.889922  | -0.867947 | -0.024414 |
| H  | 6.334163  | 3.917773  | 1.194635  |
| H  | -0.558305 | -0.891673 | -0.333243 |
| H  | -0.581935 | 0.883390  | -0.497408 |
| H  | 3.920633  | 5.605879  | 0.324609  |
| H  | 5.573935  | 6.221990  | 0.571398  |

|   |          |           |           |
|---|----------|-----------|-----------|
| H | 5.249800 | 5.065739  | -0.722785 |
| H | 5.379585 | -0.328000 | 1.400205  |

Product

0 1

|    |           |           |           |
|----|-----------|-----------|-----------|
| C  | 0.108295  | -0.137268 | -0.043264 |
| C  | 0.027484  | 0.182749  | 1.441568  |
| C  | 1.303260  | -0.073119 | 2.189557  |
| C  | 1.426241  | -1.008451 | 3.133296  |
| C  | 2.679061  | -1.331916 | 3.889403  |
| C  | 3.920569  | -0.558250 | 3.469677  |
| C  | 5.188589  | -0.940570 | 4.228703  |
| Cl | 6.541601  | 0.125841  | 3.595297  |
| Cl | 1.284927  | 0.939262  | -0.920803 |
| Cl | 2.334305  | -1.047774 | 5.684312  |
| C  | 5.599640  | -2.393328 | 4.091718  |
| H  | 3.739350  | 0.514773  | 3.580241  |
| H  | 4.074147  | -0.765483 | 2.404103  |
| H  | 2.853538  | -2.408196 | 3.840736  |
| H  | 0.565929  | -1.622882 | 3.395448  |
| H  | 2.154100  | 0.548508  | 1.917386  |
| H  | -0.776433 | -0.442700 | 1.847069  |
| H  | -0.276381 | 1.228526  | 1.567075  |
| H  | 5.109308  | -0.660577 | 5.279658  |
| H  | -0.853716 | 0.018580  | -0.530063 |
| H  | 0.449286  | -1.157857 | -0.218590 |
| H  | 5.667582  | -2.686082 | 3.039508  |
| H  | 6.562005  | -2.573696 | 4.575879  |

H 4.857999 -3.031167 4.583304

**Model: 4 monomer units**

**Level of theory:  $\omega$ B97X-D(SMD=Water)/6-311+G(d,p)**

Reactant

0 1

C -0.001410 -0.017048 0.005024

Cl 0.028849 -0.087077 1.822378

C 1.390398 0.001969 -0.587586

C 2.261093 1.190842 -0.214171

Cl 1.467977 2.745035 -0.780969

C 3.651859 1.063349 -0.819365

C 4.608118 2.204116 -0.491649

Cl 6.164338 1.889110 -1.406968

C 4.899286 2.342360 0.995023

C 5.851025 3.477256 1.352429

C 5.374237 4.851380 0.933478

Cl 6.072797 3.448892 3.174177

H 5.287488 1.392562 1.372711

H 3.944706 2.532945 1.496407

H 4.243708 3.138808 -0.913596

H 4.073269 0.126310 -0.440314

H 3.558911 0.970164 -1.904505

H 2.307229 1.299618 0.868131

H 1.278996 -0.041289 -1.676263

H 1.928707 -0.900716 -0.282558

|   |           |           |           |
|---|-----------|-----------|-----------|
| H | 6.851534  | 3.281115  | 0.971319  |
| H | -0.541761 | -0.904080 | -0.316379 |
| H | -0.577244 | 0.870564  | -0.247909 |
| H | 4.363359  | 5.044893  | 1.302106  |
| H | 6.045133  | 5.627748  | 1.304428  |
| H | 5.364085  | 4.917585  | -0.158198 |

Transition State

-1 1

|    |           |           |           |
|----|-----------|-----------|-----------|
| C  | -0.052914 | 0.034453  | -0.080677 |
| Cl | -0.236944 | 0.201470  | 1.723264  |
| C  | 1.399212  | -0.007278 | -0.500475 |
| C  | 2.235002  | 1.211325  | -0.185769 |
| C  | 3.623411  | 1.122224  | -0.538838 |
| C  | 4.461604  | 2.363674  | -0.348300 |
| Cl | 6.232719  | 1.907448  | -0.651021 |
| C  | 4.332183  | 2.999059  | 1.029033  |
| C  | 5.199335  | 4.231178  | 1.251872  |
| C  | 4.938685  | 5.367978  | 0.287225  |
| Cl | 4.885797  | 4.818855  | 2.965023  |
| Cl | 1.273021  | 2.773028  | -1.244153 |
| O  | 4.522778  | -0.664375 | 1.166846  |
| H  | 4.546176  | 2.246453  | 1.792705  |
| H  | 3.286063  | 3.301487  | 1.142619  |
| H  | 4.274009  | 3.099641  | -1.131532 |
| H  | 4.070903  | 0.178002  | 0.360620  |
| H  | 3.774785  | 0.696794  | -1.534961 |
| H  | 2.024354  | 1.634649  | 0.792020  |

|   |           |           |           |
|---|-----------|-----------|-----------|
| H | 1.424554  | -0.203447 | -1.576812 |
| H | 1.888126  | -0.857416 | -0.012736 |
| H | 6.255377  | 3.968484  | 1.264490  |
| H | -0.556174 | -0.893501 | -0.341891 |
| H | -0.585090 | 0.879017  | -0.510767 |
| H | 3.876988  | 5.628139  | 0.265279  |
| H | 5.518067  | 6.252353  | 0.557250  |
| H | 5.242101  | 5.067280  | -0.719576 |
| H | 5.347623  | -0.268680 | 1.461779  |

Product

0 1

|    |          |          |           |
|----|----------|----------|-----------|
| C  | 0.006428 | 0.002949 | -0.000905 |
| Cl | 0.012078 | 0.002006 | 1.819571  |
| C  | 1.410208 | 0.003381 | -0.580452 |
| C  | 2.194414 | 1.242128 | -0.268397 |
| C  | 2.582771 | 2.115713 | -1.193003 |
| C  | 3.336528 | 3.382326 | -0.937230 |
| Cl | 4.935242 | 3.269842 | -1.860682 |
| C  | 3.602885 | 3.708363 | 0.522784  |
| C  | 4.339564 | 5.023170 | 0.750381  |
| C  | 3.631935 | 6.250173 | 0.216898  |
| Cl | 4.571140 | 5.206512 | 2.562089  |
| H  | 4.162813 | 2.891808 | 0.984493  |
| H  | 2.626060 | 3.764913 | 1.014832  |
| H  | 2.826469 | 4.205457 | -1.436743 |
| H  | 2.337276 | 1.936629 | -2.237663 |
| H  | 2.433288 | 1.409322 | 0.778717  |

|   |           |           |           |
|---|-----------|-----------|-----------|
| H | 1.296967  | -0.104145 | -1.664206 |
| H | 1.947513  | -0.879431 | -0.218627 |
| H | 5.357220  | 4.967643  | 0.367924  |
| H | -0.539157 | -0.891790 | -0.291944 |
| H | -0.553187 | 0.889195  | -0.294880 |
| H | 2.605302  | 6.304616  | 0.588495  |
| H | 4.162965  | 7.160520  | 0.499182  |
| H | 3.604092  | 6.209907  | -0.875760 |

**Model: 4 monomer units**

**Level of theory:  $\omega$ B97X-D(SMD=Water)/def2-TZVPPD**

Reactant

0 1

|    |           |           |           |
|----|-----------|-----------|-----------|
| C  | 3.997119  | 0.053248  | -0.158470 |
| Cl | 3.770618  | 1.811490  | -0.513097 |
| C  | 2.837873  | -0.783520 | -0.646172 |
| C  | 1.486561  | -0.477317 | -0.026860 |
| Cl | 1.556638  | -0.732831 | 1.776926  |
| C  | 0.396680  | -1.344774 | -0.635299 |
| C  | -1.005965 | -1.089041 | -0.103601 |
| Cl | -2.107950 | -2.333683 | -0.847547 |
| C  | -1.521493 | 0.307301  | -0.407282 |
| C  | -2.915042 | 0.599715  | 0.127707  |
| C  | -3.044436 | 0.495912  | 1.629992  |
| Cl | -3.355882 | 2.291119  | -0.392885 |
| H  | -1.494575 | 0.469050  | -1.485583 |



|   |           |           |           |
|---|-----------|-----------|-----------|
| H | -0.828670 | 1.017513  | 0.049723  |
| H | -1.049719 | -1.302218 | 0.960486  |
| H | 0.407590  | -1.156376 | -1.711460 |
| H | 0.653596  | -2.393388 | -0.481694 |
| H | 1.256587  | 0.579026  | -0.135661 |
| H | 3.093854  | -1.829898 | -0.462180 |
| H | 2.731888  | -0.663745 | -1.726334 |
| H | -3.655762 | -0.023712 | -0.365135 |
| H | 4.914099  | -0.236330 | -0.661637 |
| H | 4.138546  | -0.018461 | 0.915749  |
| H | -2.296466 | 1.112603  | 2.129865  |
| H | -4.035952 | 0.803930  | 1.957064  |
| H | -2.901007 | -0.540741 | 1.938962  |

Transition State

-1 1

|    |           |           |           |
|----|-----------|-----------|-----------|
| C  | -0.016653 | -0.090025 | -0.026688 |
| C  | 0.017125  | 0.055295  | 1.475814  |
| C  | 1.375614  | 0.042580  | 2.133129  |
| C  | 1.374401  | 0.235232  | 3.555017  |
| C  | 2.698801  | 0.125090  | 4.266933  |
| C  | 3.804968  | 0.973789  | 3.660884  |
| C  | 5.142742  | 0.892931  | 4.379048  |
| Cl | 6.296821  | 2.017290  | 3.519596  |
| Cl | 0.847732  | 1.262039  | -0.863522 |
| Cl | 2.442138  | 0.619877  | 6.023662  |
| C  | 5.749208  | -0.490618 | 4.425519  |
| Cl | 2.175183  | -1.815096 | 1.610598  |

|   |           |           |           |
|---|-----------|-----------|-----------|
| O | 0.587445  | 2.730205  | 3.825354  |
| H | 3.472066  | 2.011196  | 3.609929  |
| H | 3.953840  | 0.623055  | 2.637141  |
| H | 3.021996  | -0.910663 | 4.361278  |
| H | 0.948674  | 1.560419  | 3.671599  |
| H | 0.615721  | -0.370482 | 4.053689  |
| H | 2.114695  | 0.616113  | 1.585751  |
| H | -0.601050 | -0.740939 | 1.895973  |
| H | -0.456959 | 1.000287  | 1.752107  |
| H | 5.071352  | 1.313614  | 5.377887  |
| H | -1.038347 | -0.057028 | -0.392010 |
| H | 0.464181  | -1.002431 | -0.363408 |
| H | 5.820222  | -0.919943 | 3.425280  |
| H | 6.741118  | -0.467264 | 4.873669  |
| H | 5.123048  | -1.142366 | 5.036823  |
| H | 1.055241  | 3.000559  | 4.617828  |

Product

0 1

|    |           |          |           |
|----|-----------|----------|-----------|
| C  | 0.005239  | 0.014343 | -0.002478 |
| Cl | -0.000294 | 0.029200 | 1.806436  |
| C  | 1.409445  | 0.011036 | -0.575972 |
| C  | 2.192598  | 1.247885 | -0.268172 |
| C  | 2.595814  | 2.109284 | -1.192354 |
| C  | 3.350853  | 3.373309 | -0.939653 |
| Cl | 4.941455  | 3.255365 | -1.852716 |
| C  | 3.611193  | 3.704614 | 0.517762  |
| C  | 4.338582  | 5.021923 | 0.742923  |

|    |           |           |           |
|----|-----------|-----------|-----------|
| C  | 3.611781  | 6.244165  | 0.230815  |
| Cl | 4.601672  | 5.196562  | 2.539214  |
| H  | 4.174791  | 2.894773  | 0.980891  |
| H  | 2.636964  | 3.755587  | 1.009925  |
| H  | 2.842123  | 4.194009  | -1.440200 |
| H  | 2.364415  | 1.921855  | -2.236292 |
| H  | 2.417507  | 1.423848  | 0.778043  |
| H  | 1.302803  | -0.103534 | -1.657205 |
| H  | 1.942179  | -0.868100 | -0.205694 |
| H  | 5.345636  | 4.977993  | 0.337572  |
| H  | -0.536748 | -0.880762 | -0.291616 |
| H  | -0.553004 | 0.894604  | -0.309346 |
| H  | 2.597782  | 6.292524  | 0.629458  |
| H  | 4.144124  | 7.154192  | 0.501791  |
| H  | 3.553903  | 6.206532  | -0.858258 |

**Model: 5 monomer units**

**Level of theory:  $\omega$ B97X-D(SMD=Water)/6-31+G(d,p)**

Reactant

0 1

|   |           |           |          |
|---|-----------|-----------|----------|
| C | -0.000000 | -0.000000 | 0.000000 |
| C | 0.000000  | -0.000000 | 1.515867 |
| C | 1.408059  | -0.000000 | 2.091805 |
| C | 1.528183  | 0.047159  | 3.607332 |
| C | 2.972605  | 0.036178  | 4.102449 |
| C | 3.747699  | -1.238274 | 3.786917 |

|    |           |           |           |
|----|-----------|-----------|-----------|
| C  | 5.189193  | -1.212068 | 4.289907  |
| C  | 6.078601  | -0.144051 | 3.662663  |
| Cl | 6.134533  | -0.358142 | 1.842243  |
| Cl | -0.918664 | -1.473807 | 2.117187  |
| Cl | 0.739555  | 1.572799  | 4.245606  |
| Cl | 2.923496  | -2.676756 | 4.567369  |
| C  | 7.488099  | -0.204480 | 4.235294  |
| C  | 8.458851  | 0.845801  | 3.734956  |
| Cl | 7.923950  | 2.532941  | 4.151376  |
| H  | 5.644339  | -2.193435 | 4.124306  |
| H  | 5.187162  | -1.023490 | 5.369863  |
| H  | 3.725081  | -1.468307 | 2.721606  |
| H  | 3.501122  | 0.872108  | 3.630611  |
| H  | 2.992216  | 0.201537  | 5.183971  |
| H  | 0.956163  | -0.757682 | 4.070330  |
| H  | 1.934114  | 0.861594  | 1.663052  |
| H  | 1.925031  | -0.899200 | 1.737759  |
| H  | 5.660399  | 0.853816  | 3.801233  |
| H  | -0.578083 | 0.842271  | 1.897598  |
| H  | 7.396622  | -0.128755 | 5.324421  |
| H  | 7.931890  | -1.182672 | 4.015153  |
| H  | 9.433372  | 0.717255  | 4.203693  |
| H  | 8.573326  | 0.826797  | 2.651448  |
| H  | -1.018301 | -0.008719 | -0.395172 |
| H  | 0.496346  | 0.911294  | -0.349305 |
| H  | 0.543629  | -0.863717 | -0.394333 |

Transition State

-1 1

|    |           |           |           |
|----|-----------|-----------|-----------|
| C  | 0.035706  | 0.063773  | -0.021040 |
| C  | 0.025722  | -0.053865 | 1.490535  |
| C  | 1.417114  | 0.081898  | 2.089692  |
| C  | 1.532456  | 0.021879  | 3.606388  |
| C  | 2.957102  | 0.135086  | 4.122247  |
| C  | 3.840426  | -0.941437 | 3.743223  |
| C  | 5.225144  | -0.958016 | 4.364353  |
| C  | 6.173738  | 0.089298  | 3.790100  |
| Cl | 6.482040  | -0.262832 | 2.014111  |
| Cl | -0.709396 | -1.674527 | 1.956347  |
| Cl | 0.523954  | 1.375134  | 4.352148  |
| Cl | 3.080686  | -2.803911 | 4.373725  |
| C  | 7.492778  | 0.125590  | 4.547122  |
| C  | 8.490605  | 1.171422  | 4.092420  |
| Cl | 7.841843  | 2.861321  | 4.271615  |
| H  | 5.681389  | -1.944423 | 4.250674  |
| H  | 5.135849  | -0.752584 | 5.437148  |
| H  | 3.846559  | -1.202860 | 2.687242  |
| H  | 3.478492  | 1.306770  | 3.584289  |
| H  | 2.965002  | 0.292259  | 5.206618  |
| H  | 1.042723  | -0.878660 | 3.987410  |
| H  | 1.825087  | 1.035797  | 1.735760  |
| H  | 2.051299  | -0.710171 | 1.674602  |
| H  | 5.705879  | 1.072749  | 3.779062  |
| H  | -0.658412 | 0.675304  | 1.926120  |
| H  | 7.252802  | 0.287205  | 5.603832  |
| H  | 7.990665  | -0.848845 | 4.474085  |

|   |           |           |           |
|---|-----------|-----------|-----------|
| H | 9.392060  | 1.131263  | 4.702345  |
| H | 8.758379  | 1.064138  | 3.041650  |
| H | -0.970186 | -0.041916 | -0.433911 |
| H | 0.416189  | 1.054150  | -0.291774 |
| H | 0.687136  | -0.691645 | -0.470793 |
| O | 3.832695  | 2.404407  | 3.109066  |
| H | 4.382892  | 2.809335  | 3.789980  |

Product

0 1

|    |           |           |          |
|----|-----------|-----------|----------|
| C  | -0.107345 | -0.166933 | 0.032481 |
| C  | -0.030162 | 0.012523  | 1.535999 |
| C  | 1.401459  | -0.045046 | 2.047782 |
| C  | 1.594560  | 0.148507  | 3.542244 |
| C  | 3.005632  | 0.055340  | 4.037808 |
| C  | 4.090421  | -0.091684 | 3.274739 |
| C  | 5.480165  | -0.195666 | 3.831067 |
| C  | 6.377019  | 0.991314  | 3.484585 |
| Cl | 6.585506  | 1.109226  | 1.664935 |
| Cl | -1.041813 | -1.290510 | 2.346427 |
| Cl | 0.938402  | 1.799699  | 4.054319 |
| C  | 7.739613  | 0.885392  | 4.153691 |
| C  | 8.699323  | 2.033078  | 3.914089 |
| Cl | 8.058132  | 3.612938  | 4.547416 |
| H  | 5.961135  | -1.116607 | 3.479541 |
| H  | 5.437392  | -0.243278 | 4.925107 |
| H  | 3.997589  | -0.147387 | 2.192286 |
| H  | 3.112671  | 0.104350  | 5.120544 |

|   |           |           |           |
|---|-----------|-----------|-----------|
| H | 0.967370  | -0.547117 | 4.103108  |
| H | 1.963769  | 0.719273  | 1.499281  |
| H | 1.832978  | -1.018019 | 1.784912  |
| H | 5.881358  | 1.925739  | 3.755054  |
| H | -0.514616 | 0.942741  | 1.835210  |
| H | 7.562736  | 0.775589  | 5.229454  |
| H | 8.242797  | -0.028166 | 3.814517  |
| H | 9.638085  | 1.860267  | 4.438332  |
| H | 8.900294  | 2.194748  | 2.855426  |
| H | -1.141476 | -0.128809 | -0.317084 |
| H | 0.447450  | 0.646819  | -0.445791 |
| H | 0.338551  | -1.117742 | -0.274290 |

**Model: 5 monomer units**

**Level of theory:  $\omega$ B97X-D(SMD=Water)/6-311+G(d,p)**

Reactant

0 1

|    |           |           |          |
|----|-----------|-----------|----------|
| C  | -0.000107 | -0.000030 | 0.000118 |
| C  | -0.000066 | 0.000202  | 1.513397 |
| C  | 1.404879  | -0.000080 | 2.090415 |
| C  | 1.520699  | 0.055645  | 3.603666 |
| C  | 2.960481  | 0.029201  | 4.103239 |
| C  | 3.717077  | -1.255707 | 3.797181 |
| C  | 5.160634  | -1.238997 | 4.285967 |
| C  | 6.050083  | -0.188985 | 3.635037 |
| Cl | 6.087072  | -0.435328 | 1.817350 |

|    |           |           |           |
|----|-----------|-----------|-----------|
| Cl | -0.915333 | -1.476869 | 2.114384  |
| Cl | 0.750076  | 1.596569  | 4.227387  |
| Cl | 2.881372  | -2.673835 | 4.601941  |
| C  | 7.462690  | -0.247462 | 4.193170  |
| C  | 8.431801  | 0.786764  | 3.664267  |
| Cl | 7.907178  | 2.483236  | 4.057398  |
| H  | 5.605494  | -2.225043 | 4.129515  |
| H  | 5.171347  | -1.036155 | 5.362113  |
| H  | 3.681474  | -1.501199 | 2.737813  |
| H  | 3.501364  | 0.854817  | 3.629973  |
| H  | 2.979853  | 0.199354  | 5.182654  |
| H  | 0.935240  | -0.733759 | 4.071673  |
| H  | 1.935336  | 0.855915  | 1.659076  |
| H  | 1.917722  | -0.902117 | 1.741546  |
| H  | 5.638427  | 0.811796  | 3.755309  |
| H  | -0.581154 | 0.837072  | 1.897023  |
| H  | 7.383515  | -0.151467 | 5.280486  |
| H  | 7.896552  | -1.231778 | 3.987077  |
| H  | 9.409454  | 0.665555  | 4.124200  |
| H  | 8.533075  | 0.751143  | 2.581679  |
| H  | -1.016977 | -0.012191 | -0.395287 |
| H  | 0.493196  | 0.911779  | -0.348982 |
| H  | 0.546657  | -0.860809 | -0.393100 |

#### Transition State

-1 1

|   |          |           |           |
|---|----------|-----------|-----------|
| C | 0.033028 | 0.102952  | -0.022651 |
| C | 0.030094 | -0.059084 | 1.482246  |



|    |           |           |          |
|----|-----------|-----------|----------|
| C  | 1.415754  | 0.095822  | 2.083679 |
| C  | 1.530651  | 0.004473  | 3.596571 |
| C  | 2.949136  | 0.132987  | 4.116913 |
| C  | 3.855511  | -0.909019 | 3.706836 |
| C  | 5.235699  | -0.914536 | 4.333327 |
| C  | 6.158293  | 0.173388  | 3.801248 |
| Cl | 6.492081  | -0.118517 | 2.018253 |
| Cl | -0.656997 | -1.714229 | 1.900528 |
| Cl | 0.496906  | 1.323803  | 4.369734 |
| C  | 7.467839  | 0.225768  | 4.568775 |
| C  | 8.429923  | 1.319186  | 4.159018 |
| Cl | 7.720117  | 2.977213  | 4.400108 |
| Cl | 3.136886  | -2.804129 | 4.268875 |
| O  | 3.771752  | 2.442289  | 3.150531 |
| H  | 5.716411  | -1.883495 | 4.188502 |
| H  | 5.136633  | -0.749258 | 5.410955 |
| H  | 3.871495  | -1.135774 | 2.644741 |
| H  | 3.443425  | 1.328845  | 3.605480 |
| H  | 2.954536  | 0.260090  | 5.203607 |
| H  | 1.054852  | -0.908672 | 3.958991 |
| H  | 1.802216  | 1.065393  | 1.753143 |
| H  | 2.067181  | -0.670428 | 1.650625 |
| H  | 5.664194  | 1.141510  | 3.810056 |
| H  | -0.673937 | 0.632578  | 1.941893 |
| H  | 7.216242  | 0.342197  | 5.627496 |
| H  | 7.996601  | -0.728071 | 4.466210 |
| H  | 9.328657  | 1.290709  | 4.770421 |
| H  | 8.702881  | 1.264631  | 3.107359 |

|   |           |           |           |
|---|-----------|-----------|-----------|
| H | -0.968946 | -0.019608 | -0.437194 |
| H | 0.383977  | 1.110454  | -0.264447 |
| H | 0.705102  | -0.618573 | -0.494338 |
| H | 4.297983  | 2.848293  | 3.845030  |

Product

0 1

|    |           |           |           |
|----|-----------|-----------|-----------|
| C  | -0.008689 | -0.011338 | -0.003784 |
| C  | -0.006516 | 0.006283  | 1.509626  |
| C  | 1.400254  | -0.005244 | 2.082634  |
| C  | 1.514515  | 0.040298  | 3.594425  |
| C  | 2.903304  | -0.004782 | 4.148043  |
| C  | 4.023740  | 0.006542  | 3.431593  |
| C  | 5.390777  | -0.050572 | 4.042883  |
| C  | 6.194642  | 1.234321  | 3.874954  |
| Cl | 6.469318  | 1.570711  | 2.091009  |
| Cl | -0.946573 | -1.449304 | 2.124803  |
| Cl | 0.717671  | 1.579177  | 4.239977  |
| C  | 7.530038  | 1.166123  | 4.596193  |
| C  | 8.392182  | 2.407574  | 4.533422  |
| Cl | 7.585976  | 3.844315  | 5.305353  |
| H  | 5.962055  | -0.882881 | 3.617418  |
| H  | 5.306419  | -0.226024 | 5.119948  |
| H  | 3.981024  | 0.057837  | 2.347196  |
| H  | 2.959739  | -0.062103 | 5.232907  |
| H  | 0.916263  | -0.748305 | 4.050338  |
| H  | 1.926946  | 0.849510  | 1.646235  |
| H  | 1.913277  | -0.910488 | 1.741189  |

|   |           |           |           |
|---|-----------|-----------|-----------|
| H | 5.609335  | 2.088929  | 4.213850  |
| H | -0.574728 | 0.855861  | 1.884666  |
| H | 7.319479  | 0.920964  | 5.641913  |
| H | 8.123072  | 0.341550  | 4.185708  |
| H | 9.318647  | 2.258334  | 5.082467  |
| H | 8.619032  | 2.708302  | 3.512902  |
| H | -1.026324 | -0.009915 | -0.397258 |
| H | 0.500359  | 0.887116  | -0.364541 |
| H | 0.521519  | -0.886573 | -0.387528 |

**Model: 5 monomer units**

**Level of theory:  $\omega$ B97X-D(SMD=Water)/def2-TZVPPD**

Reactant

0 1

|    |           |           |          |
|----|-----------|-----------|----------|
| C  | -0.001302 | -0.000562 | 0.000006 |
| C  | -0.000097 | 0.000190  | 1.511103 |
| Cl | 1.726368  | 0.001386  | 2.107904 |
| C  | -0.744085 | 1.190120  | 2.085668 |
| C  | -0.849717 | 1.259690  | 3.596518 |
| Cl | -1.734530 | -0.204128 | 4.221787 |
| C  | -1.589678 | 2.491583  | 4.097274 |
| C  | -0.904209 | 3.814375  | 3.796152 |
| Cl | 0.731364  | 3.858725  | 4.595259 |
| C  | -1.686872 | 5.024031  | 4.285671 |
| C  | -3.034054 | 5.236919  | 3.614371 |
| C  | -3.745145 | 6.447167  | 4.191422 |

|    |           |           |           |
|----|-----------|-----------|-----------|
| C  | -5.126325 | 6.726961  | 3.647641  |
| Cl | -6.283138 | 5.380505  | 3.989482  |
| Cl | -2.812544 | 5.444833  | 1.816879  |
| H  | -1.081352 | 5.920884  | 4.151233  |
| H  | -1.880779 | 4.913403  | 5.355234  |
| H  | -0.682283 | 3.916198  | 2.738037  |
| H  | -2.575139 | 2.513382  | 3.627085  |
| H  | -1.742754 | 2.413749  | 5.173996  |
| H  | 0.131614  | 1.189543  | 4.057362  |
| H  | -1.749606 | 1.184370  | 1.657094  |
| H  | -0.254353 | 2.101775  | 1.736228  |
| H  | -3.663970 | 4.355882  | 3.703003  |
| H  | -0.406821 | -0.932258 | 1.892808  |
| H  | -3.801644 | 6.303208  | 5.272331  |
| H  | -3.141172 | 7.341116  | 4.017290  |
| H  | -5.549566 | 7.609097  | 4.117277  |
| H  | -5.130228 | 6.857143  | 2.569501  |
| H  | 0.545164  | -0.855644 | -0.394138 |
| H  | -1.033420 | -0.061919 | -0.349565 |
| H  | 0.441303  | 0.915571  | -0.392302 |

Transition State

-1 1

|    |           |           |           |
|----|-----------|-----------|-----------|
| C  | -0.088450 | -0.006620 | -0.009685 |
| C  | 0.023595  | 0.059427  | 1.496132  |
| Cl | 1.779313  | 0.293781  | 1.948995  |
| C  | -0.823405 | 1.168471  | 2.089008  |
| C  | -0.833504 | 1.298802  | 3.600974  |

|    |           |           |           |
|----|-----------|-----------|-----------|
| Cl | -1.456264 | -0.259413 | 4.342992  |
| C  | -1.670085 | 2.451045  | 4.115988  |
| C  | -1.215482 | 3.764208  | 3.737603  |
| C  | -1.927970 | 4.947005  | 4.358024  |
| C  | -3.312295 | 5.208653  | 3.786767  |
| C  | -4.031685 | 6.307966  | 4.544327  |
| C  | -5.444311 | 6.600915  | 4.096196  |
| Cl | -6.532021 | 5.169077  | 4.289513  |
| Cl | -3.176127 | 5.656586  | 2.022278  |
| Cl | 0.743229  | 4.093502  | 4.339839  |
| O  | -4.064780 | 2.004783  | 3.103786  |
| H  | -1.329484 | 5.849814  | 4.247099  |
| H  | -2.054779 | 4.762895  | 5.427258  |
| H  | -1.013721 | 3.905405  | 2.682097  |
| H  | -2.958330 | 2.276062  | 3.574863  |
| H  | -1.804038 | 2.375170  | 5.196802  |
| H  | 0.187726  | 1.348390  | 3.978000  |
| H  | -1.845592 | 1.013295  | 1.736251  |
| H  | -0.485524 | 2.120530  | 1.672839  |
| H  | -3.904057 | 4.299343  | 3.775030  |
| H  | -0.230899 | -0.899304 | 1.939702  |
| H  | -4.038281 | 6.021868  | 5.598124  |
| H  | -3.466200 | 7.240206  | 4.468169  |
| H  | -5.882177 | 7.390419  | 4.698745  |
| H  | -5.498615 | 6.876069  | 3.047143  |
| H  | 0.529998  | -0.804274 | -0.417995 |
| H  | -1.127832 | -0.207711 | -0.275250 |
| H  | 0.205898  | 0.939216  | -0.465879 |

H -4.690261 2.267274 3.781830

Product

O 1

C -4.450972 -1.676105 -1.406928

C -4.042270 -0.407522 -0.694486

C -2.618431 -0.474958 -0.176465

C -2.100555 0.762757 0.525135

C -0.711274 0.675199 1.066769

C 0.114517 -0.351740 0.917290

C 1.494853 -0.389255 1.491679

C 2.601241 -0.377334 0.445253

Cl 2.473292 -1.856533 -0.614507

Cl -5.198595 -0.101591 0.686286

Cl -2.148709 2.200544 -0.618044

C 3.977486 -0.315647 1.080071

C 5.149347 -0.246708 0.129576

Cl 5.115512 1.242155 -0.895780

H 1.617750 -1.274859 2.120675

H 1.654889 0.486544 2.124193

H -0.196002 -1.225374 0.355590

H -0.390049 1.542881 1.634418

H -2.780011 1.062030 1.320325

H -1.979896 -0.709085 -1.031228

H -2.537051 -1.309411 0.524229

H 2.454573 0.452765 -0.242207

H -4.177998 0.454050 -1.342567

H 3.990730 0.555959 1.737896

|   |           |           |           |
|---|-----------|-----------|-----------|
| H | 4.125289  | -1.195775 | 1.711204  |
| H | 6.084519  | -0.208293 | 0.678997  |
| H | 5.172670  | -1.083972 | -0.561498 |
| H | -5.476301 | -1.612487 | -1.767123 |
| H | -3.793774 | -1.823487 | -2.265719 |
| H | -4.358475 | -2.541392 | -0.749787 |

We present the cartesian coordinates of optimized stationary points of the reaction with the inclusion of an explicit water molecule. The Reactant is a PVC model, which reacts with a hydroxide ion and a water molecule, forming the studied E2 Transition State. From the Transition State, a H<sub>2</sub>O dimer, Cl<sup>-</sup>, and the Product are formed.

### **Model: 2 monomer units including an explicit water molecule**

**Level of theory:  $\omega$ B97X-D(SMD=Water)/6-31+G(d,p)**

Reactant

0 1

|    |           |           |           |
|----|-----------|-----------|-----------|
| C  | -0.013515 | -0.007895 | -0.008429 |
| C  | -0.019678 | 0.012715  | 1.507536  |
| Cl | 1.717084  | -0.027622 | 2.112003  |
| C  | -0.739534 | 1.230866  | 2.072149  |
| C  | -0.864225 | 1.196866  | 3.584202  |
| Cl | -1.856680 | 2.595380  | 4.177436  |
| H  | 0.452733  | 0.896026  | -0.411624 |
| H  | -1.048663 | -0.052186 | -0.362117 |
| H  | 0.517317  | -0.883200 | -0.389687 |
| H  | -0.455960 | -0.906255 | 1.903967  |
| H  | -1.740952 | 1.229491  | 1.627318  |
| H  | -0.232387 | 2.145582  | 1.747600  |

H -1.373955 0.295457 3.926415

H 0.100195 1.283969 4.083354

H2O

0 1

O 1.02113500 3.58631200 -0.14058100

H 1.63340900 2.92497800 0.19279200

H 0.35013500 3.07936700 -0.60550100

OH

-1 1

O 2.71965200 1.88944700 0.72517300

H 2.52456500 1.67997200 1.64094700

Transition State

-1 1

C -0.088450 -0.006620 -0.009685

C 0.023595 0.059427 1.496132

Cl 1.779313 0.293781 1.948995

C -0.823405 1.168471 2.089008

C -0.833504 1.298802 3.600974

Cl -1.456264 -0.259413 4.342992

C -1.670085 2.451045 4.115988

C -1.215482 3.764208 3.737603

C -1.927970 4.947005 4.358024

C -3.312295 5.208653 3.786767

C -4.031685 6.307966 4.544327



|    |           |           |           |
|----|-----------|-----------|-----------|
| C  | -5.444311 | 6.600915  | 4.096196  |
| Cl | -6.532021 | 5.169077  | 4.289513  |
| Cl | -3.176127 | 5.656586  | 2.022278  |
| Cl | 0.743229  | 4.093502  | 4.339839  |
| O  | -4.064780 | 2.004783  | 3.103786  |
| H  | -1.329484 | 5.849814  | 4.247099  |
| H  | -2.054779 | 4.762895  | 5.427258  |
| H  | -1.013721 | 3.905405  | 2.682097  |
| H  | -2.958330 | 2.276062  | 3.574863  |
| H  | -1.804038 | 2.375170  | 5.196802  |
| H  | 0.187726  | 1.348390  | 3.978000  |
| H  | -1.845592 | 1.013295  | 1.736251  |
| H  | -0.485524 | 2.120530  | 1.672839  |
| H  | -3.904057 | 4.299343  | 3.775030  |
| H  | -0.230899 | -0.899304 | 1.939702  |
| H  | -4.038281 | 6.021868  | 5.598124  |
| H  | -3.466200 | 7.240206  | 4.468169  |
| H  | -5.882177 | 7.390419  | 4.698745  |
| H  | -5.498615 | 6.876069  | 3.047143  |
| H  | 0.529998  | -0.804274 | -0.417995 |
| H  | -1.127832 | -0.207711 | -0.275250 |
| H  | 0.205898  | 0.939216  | -0.465879 |
| H  | -4.690261 | 2.267274  | 3.781830  |

Product

0 1

|   |          |          |          |
|---|----------|----------|----------|
| C | 0.000000 | 0.000000 | 0.000000 |
| C | 0.000000 | 0.000000 | 1.490952 |

|    |           |           |           |
|----|-----------|-----------|-----------|
| C  | 1.087903  | 0.000000  | 2.251380  |
| C  | 1.035954  | 0.033177  | 3.732546  |
| Cl | 1.695180  | -1.517859 | 4.445647  |
| H  | -0.526768 | 0.875546  | -0.385350 |
| H  | 1.012594  | -0.001290 | -0.402408 |
| H  | -0.528018 | -0.876343 | -0.382286 |
| H  | -0.972706 | 0.004381  | 1.975432  |
| H  | 2.073923  | -0.008500 | 1.797946  |
| H  | 1.661616  | 0.813965  | 4.154811  |
| H  | 0.021976  | 0.124237  | 4.108997  |

H2O dimer

0 1

|   |           |          |          |
|---|-----------|----------|----------|
| O | -0.936386 | 2.770470 | 2.424857 |
| O | 1.183984  | 3.472395 | 0.727426 |
| H | -0.876695 | 1.858370 | 2.723668 |
| H | -1.779627 | 2.822527 | 1.965495 |
| H | 0.447097  | 3.195215 | 1.301102 |
| H | 1.419704  | 2.683429 | 0.233328 |

Cl-

-1 1

|    |          |          |          |
|----|----------|----------|----------|
| Cl | 0.000000 | 0.000000 | 0.000000 |
|----|----------|----------|----------|

## References

- (1) Frisch, M. J. T., G. W.; Schlegel, H. B.; Scuseria, G. E.; Robb, M. A.; Cheeseman, J. R.; Scalmani, G.; Barone, V.; Petersson, G. A.; Nakatsuji, H.; Li, X.; Caricato, M.; Marenich, A. V.; Bloino, J.; Janesko, B. G.; Gomperts, R.; Mennucci, B.; Hratchian, H. P.; Ortiz, J. V.; Izmaylov, A. F.; Sonnenberg, J. L.; Williams; Ding, F.; Lipparini, F.; Egidi, F.; Goings, J.; Peng, B.; Petrone, A.; Henderson, T.; Ranasinghe, D.; Zakrzewski, V. G.; Gao, J.; Rega, N.; Zheng, G.; Liang, W.; Hada, M.; Ehara, M.; Toyota, K.; Fukuda, R.; Hasegawa, J.; Ishida, M.; Nakajima, T.; Honda, Y.; Kitao, O.; Nakai, H.; Vreven, T.; Throssell, K.; Montgomery Jr., J. A.; Peralta, J. E.; Ogliaro, F.; Bearpark, M. J.; Heyd, J. J.; Brothers, E. N.; Kudin, K. N.; Staroverov, V. N.; Keith, T. A.; Kobayashi, R.; Normand, J.; Raghavachari, K.; Rendell, A. P.; Burant, J. C.; Iyengar, S. S.; Tomasi, J.; Cossi, M.; Millam, J. M.; Klene, M.; Adamo, C.; Cammi, R.; Ochterski, J. W.; Martin, R. L.; Morokuma, K.; Farkas, O.; Foresman, J. B.; Fox, D. J. Gaussian 16 Rev. C.01. Wallingford, CT, **2016**.
- (2) Neese, F. Software update: The ORCA program system—Version 5.0. *Wiley Interdisciplinary Reviews: Computational Molecular Science* **2022**, *12* (5), e1606.
- (3) Riplinger, C.; Sandhoefer, B.; Hansen, A.; Neese, F. Natural triple excitations in local coupled cluster calculations with pair natural orbitals. *The Journal of chemical physics* **2013**, *139* (13).
- (4) Zheng, J. B., J. L.; Meana-Pañeda, R.; Zhang, S.; Lynch, B. J.; Corchado, J. C.; Chuang, Y.-Y.; Fast, P. L.; Hu, W.-P.; Liu, Y.-P.; Lynch, G. C.; Nguyen, K. A.; Jackels, C. F.; Fernandez Ramos, A.; Ellingson, B. A.; Melissas, V. S.; Villà, J. Rossi, I.; Coitiño, E. L.; Pu, J.; Albu, T. V.; Ratkiewicz, A.; Steckler, R.; Garrett, B. C.; Isaacson, A. D.; Truhlar, D. G. Polyrate-version 2017-C. *University of Minnesota: Minneapolis* **2017**.
- (5) Zheng, J.; Bao, J.; Zhang, S.; Corchado, J.; Meana-Pañeda, R.; Chuang, Y.; Coitiño, E.; Ellingson, B.; Truhlar, D. Gaussrate 17. *University of Minnesota, Minneapolis, MN* **2017**.
- (6) Pracht, P.; Bohle, F.; Grimme, S. Automated exploration of the low-energy chemical space with fast quantum chemical methods. *Physical Chemistry Chemical Physics* **2020**, *22* (14), 7169-7192.
- (7) Bannwarth, C.; Ehlert, S.; Grimme, S. GFN2-xTB—An accurate and broadly parametrized self-consistent tight-binding quantum chemical method with multipole electrostatics and density-dependent dispersion contributions. *Journal of chemical theory and computation* **2019**, *15* (3), 1652-1671.
- (8) Grimme, S. Exploration of chemical compound, conformer, and reaction space with meta-dynamics simulations based on tight-binding quantum chemical calculations. *Journal of chemical theory and computation* **2019**, *15* (5), 2847-2862.
- (9) Clark, T.; Chandrasekhar, J.; Spitznagel, G. W.; Schleyer, P. V. R. Efficient diffuse function-augmented basis sets for anion calculations. III. The 3-21+ G basis set for first-row elements, Li–F. *Journal of Computational Chemistry* **1983**, *4* (3), 294-301.
- (10) Ditchfield, R.; Hehre, W. J.; Pople, J. A. Self-consistent molecular-orbital methods. IX. An extended Gaussian-type basis for molecular-orbital studies of organic molecules. *The Journal of Chemical Physics* **1971**, *54* (2), 724-728.
- (11) Marenich, A. V.; Cramer, C. J.; Truhlar, D. G. Universal solvation model based on solute electron density and on a continuum model of the solvent defined by the bulk dielectric constant and atomic surface tensions. *The Journal of Physical Chemistry B* **2009**, *113* (18), 6378-6396.
- (12) Spitznagel, G. W.; Clark, T.; von Ragué Schleyer, P.; Hehre, W. J. An evaluation of the performance of diffuse function-augmented basis sets for second row elements, Na–Cl. *Journal of computational chemistry* **1987**, *8* (8), 1109-1116.
- (13) Chai, J.-D.; Head-Gordon, M. Long-range corrected hybrid density functionals with damped atom–atom dispersion corrections. *Physical Chemistry Chemical Physics* **2008**, *10* (44), 6615-6620, 10.1039/B810189B. DOI: 10.1039/B810189B.
- (14) Hariharan, P. C.; Pople, J. A. The influence of polarization functions on molecular orbital hydrogenation energies. *Theoretica chimica acta* **1973**, *28*, 213-222.
- (15) Dunning Jr, T. H. Gaussian basis sets for use in correlated molecular calculations. I. The atoms boron through neon and hydrogen. *The Journal of chemical physics* **1989**, *90* (2), 1007-1023.
- (16) Weigend, F.; Ahlrichs, R. Balanced basis sets of split valence, triple zeta valence and quadruple zeta valence quality for H to Rn: Design and assessment of accuracy. *Physical Chemistry Chemical Physics* **2005**, *7* (18), 3297-3305, 10.1039/B508541A. DOI: 10.1039/B508541A.

- (17) Zhao, Y.; Truhlar, D. G. The M06 suite of density functionals for main group thermochemistry, thermochemical kinetics, noncovalent interactions, excited states, and transition elements: two new functionals and systematic testing of four M06-class functionals and 12 other functionals. *Theoretical chemistry accounts* **2008**, *120*, 215-241.
- (18) Zheng, J.; Zhao, Y.; Truhlar, D. G. The DBH24/08 database and its use to assess electronic structure model chemistries for chemical reaction barrier heights. *Journal of Chemical Theory and Computation* **2009**, *5* (4), 808-821.
- (19) Liakos, D. G.; Sparta, M.; Kesharwani, M. K.; Martin, J. M.; Neese, F. Exploring the accuracy limits of local pair natural orbital coupled-cluster theory. *Journal of chemical theory and computation* **2015**, *11* (4), 1525-1539.
- (20) McLean, A.; Chandler, G. Contracted Gaussian basis sets for molecular calculations. I. Second row atoms,  $Z=11-18$ . *The Journal of chemical physics* **1980**, *72* (10), 5639-5648.
- (21) Rappoport, D.; Furche, F. Property-optimized Gaussian basis sets for molecular response calculations. *The Journal of chemical physics* **2010**, *133* (13).
- (22) Kendall, R. A.; Dunning Jr, T. H.; Harrison, R. J. Electron affinities of the first-row atoms revisited. Systematic basis sets and wave functions. *The Journal of chemical physics* **1992**, *96* (9), 6796-6806.
- (23) Woon, D. E.; Dunning Jr, T. H. Gaussian basis sets for use in correlated molecular calculations. III. The atoms aluminum through argon. *The Journal of chemical physics* **1993**, *98* (2), 1358-1371.
- (24) Weigend, F.; Furche, F.; Ahlrichs, R. Gaussian basis sets of quadruple zeta valence quality for atoms H-Kr. *The Journal of chemical physics* **2003**, *119* (24), 12753-12762.
- (25) Waluk, J. Nuclear Quantum Effects in Proton or Hydrogen Transfer. *The Journal of Physical Chemistry Letters* **2024**, *15* (2), 598-607.
- (26) Schreiner, P. R. Quantum mechanical tunneling is essential to understanding chemical reactivity. *Trends in Chemistry* **2020**, *2* (11), 980-989.
- (27) Meisner, J.; Kästner, J. Atom tunneling in chemistry. *Angewandte Chemie International Edition* **2016**, *55* (18), 5400-5413.
- (28) Bao, J. L.; Truhlar, D. G. Variational transition state theory: theoretical framework and recent developments. *Chemical Society Reviews* **2017**, *46* (24), 7548-7596.
- (29) Truhlar, D. G. Semiclassical Multidimensional Tunnelling Calculations. *Tunnelling in Molecules* **2020**, 261-282.
- (30) Truhlar, D. G.; Garrett, B. C. Variational transition-state theory. *Accounts of Chemical Research* **1980**, *13* (12), 440-448.
- (31) Page, M.; McIver Jr, J. W. On evaluating the reaction path Hamiltonian. *The Journal of chemical physics* **1988**, *88* (2), 922-935.
- (32) Greer, E. M.; Siev, V.; Segal, A.; Greer, A.; Doubleday, C. Computational evidence for tunneling and a hidden intermediate in the biosynthesis of tetrahydrocannabinol. *Journal of the American Chemical Society* **2022**, *144* (17), 7646-7656.
- (33) Kozuch, S.; Schleif, T.; Karton, A. Quantum mechanical tunnelling: the missing term to achieve sub-kJ mol<sup>-1</sup> barrier heights. *Physical Chemistry Chemical Physics* **2021**, *23* (18), 10888-10898.
- (34) Nandi, A.; Alassad, Z.; Milo, A.; Kozuch, S. Quantum Tunneling on Carbene Organocatalysis: Breslow Intermediate Formation via Water-Bridges. *ACS catalysis* **2021**, *11* (24), 14836-14841.
- (35) Gonzalez-James, O. M.; Zhang, X.; Datta, A.; Hrovat, D. A.; Borden, W. T.; Singleton, D. A. Experimental evidence for heavy-atom tunneling in the ring-opening of cyclopropylcarbinyl radical from intramolecular <sup>12</sup>C/<sup>13</sup>C kinetic isotope effects. *Journal of the American Chemical Society* **2010**, *132* (36), 12548-12549.
- (36) Liu, Y. P.; Lynch, G. C.; Truong, T. N.; Lu, D. H.; Truhlar, D. G.; Garrett, B. C. Molecular modeling of the kinetic isotope effect for the [1, 5]-sigmatropic rearrangement of cis-1, 3-pentadiene. *Journal of the American Chemical Society* **1993**, *115* (6), 2408-2415.
- (37) Truong, T. N. A direct ab initio dynamics approach for calculating thermal rate constants using variational transition state theory and multidimensional semiclassical tunneling methods. An application to the CH<sub>4</sub><sup>+</sup> H ↔ CH<sub>3</sub><sup>+</sup> H<sub>2</sub> reaction. *The Journal of chemical physics* **1994**, *100* (11), 8014-8025.
